# Supplementary material for: Retro Diels–Alder reaction under mild conditions: experimental and theoretical studies
Source: Royal Society of Chemistry journal article supplement (doi:10.1039/b604063b), 2006-01-01
Supplement: b604063b.pdf [file b604063b.pdf]

## Supporting Information

Sambasivarao Kotha\*, Shaibal Banerjee,<sup>a</sup> Mahendra P. Patil<sup>b</sup> and Raghavan B. Sunoj\*<sup>b</sup>  
*Department of Chemistry, Indian Institute of Technology-Bombay, Powai, Mumbai  
400076, India*

| Contents                                                                                                                                                                                                                                                                                                                            | Page No. |
|-------------------------------------------------------------------------------------------------------------------------------------------------------------------------------------------------------------------------------------------------------------------------------------------------------------------------------------|----------|
| General remarks                                                                                                                                                                                                                                                                                                                     | 2        |
| Representative procedure for Diels–Alder reaction                                                                                                                                                                                                                                                                                   | 3        |
| Representative procedure for retro Diels–Alder reaction in presence of scavenger                                                                                                                                                                                                                                                    | 3        |
| Characterization of the Diels-Alder adducts 2a-2e                                                                                                                                                                                                                                                                                   | 3        |
| Characterization of the Diels-Alder adducts 3a-3e                                                                                                                                                                                                                                                                                   | 4        |
| Computational Methods                                                                                                                                                                                                                                                                                                               | 5        |
| Table S1. Key Structural Parameter of spiro DA adduct obtained at the B3LYP/6-31G* level. (bond distance in Å)                                                                                                                                                                                                                      | 6        |
| Table S2. Key Structural Parameter obtained at the B3LYP/6-31G* level for the Transition State of rDA reaction of spiro DA adduct. (bond distance in Å)                                                                                                                                                                             | 7        |
| Table S3. Energetics of retro Diels-Alder reaction Spiro DA adduct at the B3LYP/6-311+G**//B3LYP/6-31G* level of theory.                                                                                                                                                                                                            | 7        |
| Table S4. Major orbital interactions in spiro DA adduct computed at the NBO/B3LYP/6-311+G**//6-31G*                                                                                                                                                                                                                                 | 8        |
| Table S5. Major orbital interactions in spiro DA adduct computed at the NBO/B3LYP/6-311+G**//6-31G*                                                                                                                                                                                                                                 | 8        |
| Table S6. Major orbital interactions in Transition state computed at the NBO/B3LYP/6-311+G**//6-31G*                                                                                                                                                                                                                                | 9        |
| Table S7. Major orbital interactions in Transition state computed at the NBO/B3LYP/6-311+G**//6-31G*                                                                                                                                                                                                                                | 10       |
| Table S8. Cartesian Coordinates of the B3LYP/6-31G* Optimized Geometry of Cycloadducts Formed between Spiro Cyclopentadiene and various Quinone and respective Transition states of retro Diels-Alder reaction. The Values in Parenthesis Implies Single-Point Energies Evaluated at the <b>B3LYP/6-311+G**//B3LYP/6-31G*</b> Level | 11       |
| Table S9. Cartesian Coordinates of the B3LYP/6-31G* Optimized Geometry of Spiro cyclopentadiene and various quinones. The Values in Parenthesis Implies Single-Point Energies Evaluated at the <b>B3LYP/6-311+G**//B3LYP/6-31G*</b> Level                                                                                           | 21       |

## **GENERAL REMARKS**

### ***Melting points / Boiling points :***

Melting points were recorded on Labhosp or Veego melting point apparatus and are uncorrected. Boiling points refer to the bath temperatures.

### ***Infrared spectra :***

Infrared (IR) spectra were recorded on Nicolet Impact-400 FT IR spectrometer. Solid samples were recorded as KBr wafers and liquid samples as their film between NaCl plates.

### ***Nuclear Magnetic Resonance spectra:***

Proton Nuclear Magnetic Resonance ( $^1\text{H}$  NMR) spectra were generally recorded Varian VXR 300 (300 MHz) and 400 MHz spectrometers. Carbon Nuclear Magnetic Resonance ( $^{13}\text{C}$  NMR) spectra were recorded on Varian VXR 300 (75.4 MHz) and 100 MHz spectrometers. NMR samples were generally made in chloroform-d solvent and chemical shifts were reported in  $\delta$  scale using tetramethylsilane (TMS, or  $\text{SiMe}_4$ ) as the internal standard. The standard abbreviations s, d, t, q, m, dd and dq, refer to singlet, doublet, triplet, quartet, multiplet, doublet of doublet, and doublet of quartet respectively. Coupling constants (J) were reported in Hertz.

### ***Mass spectra:***

The high-resolution mass measurements were carried out using Micromass Q-Tof micro mass spectrometer instrument.

### ***Chromatography :***

Analytical thin-layer chromatography (tlc) were performed on (10×5 cm) glass plates coated with Acme's silica gel G or GF 254 (containing 13% calcium sulfate as a binder) Silica gel is coated on glass plate using 'Sandwich Technique.' In this process, two equally sized clean glass plates are immersed in uniformly stirred silica gel suspension in an organic solvent (usually ethyl acetate). Only the exposed surface of the plate is thus coated with silica gel. The solvent evaporates readily leaving a thin-layer of silica gel and then the plate is ready for the use. Visualization of the spots on tlc plates was achieved either by exposure to iodine vapors or UV light. Flash chromatography

was performed using Acme's silica gel (100-200 mesh) and the column is usually eluted with ethyl acetate-hexane mixture.

### ***Experimental Section***

Representative procedure for preparation of Diels-Alder adducts: To a stirred solution of CTAB (0.06 mmol) in 50 mL water was added quinone (3.2 mmol). To this solution, spiroheptadiene 3.5 gm was added slowly and the reaction mixture was stirred at RT for 4 h. At the conclusion of the reaction, (TLC monitoring) the reaction mixture was extracted with ether (3 X 30 mL). The combined organic layers were dried (MgSO<sub>4</sub>), filtered and concentrated. The product was isolated by column chromatography (SiO<sub>2</sub>: hexane/ethyl acetate = 10:1) to afford the colorless Diels-Alder adduct **2a-e**.

Representative procedure for retro Diels-Alder reaction in presence of scavenger

To a solution of the Diels-Alder adduct **2d** (38 mg, 0.15 mmol) in acetonitrile (10 mL) was added *N*-phenylmaleimide (61 mg, 0.35mmol). The reaction mixture was heated under reflux for 10 h. At the conclusion of the reaction, acetonitrile was removed under vacuum and the crude product was charged on a silica-gel column and eluted with ethyl acetate/hexane to afford the desired product **1d** (21 mg, 87 %).

### **Characterization of the Diels-Alder adducts**

**2a:** colorless solid: mp 110-111 °C; (lit<sup>12</sup> 110 °C)

**2b:** colorless solid: mp 111-113 °C.  $\delta_{\text{H}}$ (400 MHz, CDCl<sub>3</sub>) 0.48-0.61 (m, 4H), 1.93 (s, 6H), 3.04-3.06 (m, 2H), 3.39 (dd, 2H,  $J_1=2.6$ ,  $J_2=1.2$  Hz), 6.08 (dd,  $J_1=J_2=1.8$  Hz, 2H);  $\delta_{\text{C}}$ (100 MHz, CDCl<sub>3</sub>) 6.8, 7.9, 13.2, 44.7, 49.1, 53.7, 135.4, 147.8, 198.6.;  $\nu_{\text{max}}$ (neat)/cm<sup>-1</sup> 2973, 1675, 1617, 1286, 1195 cm<sup>-1</sup>; HRMS: m/z for (C<sub>15</sub>H<sub>16</sub>O<sub>2</sub>+H) found 229.1238 (M+1): calculated 229.1229.

**2c:** colorless solid: mp 142-144 °C,  $\delta_{\text{H}}$  (400 MHz, CDCl<sub>3</sub>) 0.55-0.68 (m, 4H), 3.02-3.06 (m, 2H), 3.56-3.66 (m, 2H), 6.11 (dd,  $J_1=J_2=2$  Hz, 2H), 7.11-7.26 (m, 1H), 7.54-7.62 (m, 2H), 12.63 (s, 1H);  $\delta_{\text{C}}$  (100 MHz, CDCl<sub>3</sub>) 7.3, 8.3, 45.3, 50.0, 50.4, 54.7, 54.9, 118.5,

118.7, 123.7, 135.3, 136.0, 136.2, 137.1, 162.4, 196.9, 204.7;  $\nu_{\max}(\text{neat})/\text{cm}^{-1}$  3444, 2924, 1674, 1631, 1451, 1266, 1232  $\text{cm}^{-1}$ . MS Q-ToF 267.0098 (M+1)

**2d**: colorless solid: mp 152 °C (lit,<sup>12</sup> 152-153 °C);  $\delta_{\text{H}}$  (400 MHz,  $\text{CDCl}_3$ ) 0.54-0.66 (m, 4H), 3.02-3.04 (m, 2H), 3.62-3.63 (m, 2H), 6.07 (dd,  $J_1=J_2=1.8$  Hz, 2H), 7.67-7.69 (m, 2H), 8.01-8.06 (m, 2H);  $\nu_{\max}(\text{neat})/\text{cm}^{-1}$  2973, 1675, 1617, 1265, 1195  $\text{cm}^{-1}$ .

**2e**: pale yellow solid: mp 155 °C (decomposed),  $\delta_{\text{H}}$  (400 MHz,  $\text{CDCl}_3$ ) 0.56-0.69 (m, 4H), 3.07-3.09 (m, 2H), 3.71 (dd,  $J_1=2.4$ ,  $J_2=1.5$  Hz, 2H), 6.06 (dd,  $J_1=J_2=1.8$  Hz, 2H), 7.66 (dd,  $J_1=6.2$ ,  $J_2=3.3$  Hz, 2H), 8.03 (dd,  $J_1=6.3$ ,  $J_2=3.3$  Hz, 2H), 8.59 (s, 2H).  $\delta_{\text{C}}$  (100 MHz,  $\text{CDCl}_3$ ) 7.1, 8.3, 45.3, 50.8, 54.9, 128.9, 129.4, 130.0, 131.9, 135.1, 135.7, 197.9; IR  $\nu_{\max}(\text{neat})/\text{cm}^{-1}$  3060, 2972, 1676, 1617, 1286, 1269, 1194  $\text{cm}^{-1}$ ; HRMS m/z for  $\text{C}_{21}\text{H}_{16}\text{O}_2\text{Na}$  found 323.1058 (M+Na) calculated 323.1048.

**3a**: colorless solid: mp 105-106 °C (lit,<sup>12</sup> 106 °C)

**3b**: (Major diastereomer)

colorless solid: mp 69-71 °C,  $\delta_{\text{H}}$  (300 MHz,  $\text{CDCl}_3$ ) 0.13-0.15 (m, 1H); 0.57-0.59 (m, 1H), 0.98-1.06 (m, 4H), 1.93 (s, 6H), 2.84-2.85 (m, 1H), 3.11-3.13 (m, 1H), 3.36-3.37 (m, 2H), 6.08 (dd,  $J_1=J_2=2.0$  Hz, 2H).  $\delta_{\text{C}}$  (100 MHz,  $\text{CDCl}_3$ ) 13.3, 14.1, 14.9, 15.8, 48.9, 49.0, 49.6, 50.2, 54.6, 135.5, 147.8, 147.9, 198.8, 198.9;  $\nu_{\max}(\text{neat})/\text{cm}^{-1}$  2997, 2918, 1655, 1611, 1374, 1287  $\text{cm}^{-1}$ ; HRMS: m/z for  $(\text{C}_{16}\text{H}_{18}\text{O}_2+\text{H})$  found 243.1384 (M+1), calculated 243.1385.

**3d**: mp 139-141 °C (lit<sup>12</sup> 140 °C)

**3e**: (Major diastereomer) mp 130-132 °C,  $\delta_{\text{H}}$  (300 MHz,  $\text{CDCl}_3$ ) 0.23-0.25 (m, 1H), 0.70-0.75 (m, 1H), 1.03-1.13 (m, 3H), 1.14-1.15 (m, 1H), 3.01-3.05 (m, 1H), 3.30-3.32 (m, 1H), 3.68-3.69 (m, 2H), 6.06 (dd,  $J_1=J_2=1.8$  Hz, 2H), 7.65-7.67 (m, 2H), 8.02-8.04

(m, 2H), 8.59-8.60 (m, 2H);  $\nu_{\max}(\text{neat})/\text{cm}^{-1}$  3058, 2973, 1675, 1618, 1452, 1265, 1195  $\text{cm}^{-1}$ ; HRMS: m/z for  $\text{C}_{22}\text{H}_{18}\text{O}_2\text{Na}$  found 337.1204 (M+Na), calculated 337.1204.

**4:**

colorless solid: mp 175 °C;  $\delta_{\text{H}}$  (300 MHz,  $\text{CDCl}_3$ ) 0.51-0.67 (m, 4H), 2.88-2.90 (m, 2H), 3.57-3.58 (m, 2H), 6.34 (dd,  $J_1=J_2=1.8$  Hz, 2H), 7.13-7.16 (m, 2H), 7.41-7.45 (m, 3H);  $\delta_{\text{C}}$  (75 MHz,  $\text{CDCl}_3$ ) 6.8, 7.9, 46.3, 48.5, 50.6, 126.7, 128.7, 129.2, 132.0, 134.7, 176.7;  $\nu_{\max}(\text{neat})/\text{cm}^{-1}$  3069, 2999, 1774, 1708, 1596, 1499, 1380, 1192, 1159  $\text{cm}^{-1}$ ; HRMS m/z for  $\text{C}_{17}\text{H}_{15}\text{O}_2\text{NNa}$  found 288.1011 (M+Na): calculated 288.1000.

### Computational Methods

Potential energy surfaces have been explored by using the B3LYP/6-31G\* level of theory using GAUSSIAN 98 suite of quantum chemical program.<sup>16</sup> All geometries were fully optimized and have been characterized as stationary points on the potential energy surface at the same level of theory by evaluating corresponding Hessian indices. Single point energies have been computed with more flexible basis set, namely, the 6-311+G\*\*. Zero-point vibrational energies (at the B3LYP/6-31G\* level) have been scaled by 0.9806 and are included in the reported energies.<sup>17</sup> Transition states of cycloreversion reaction have been characterized by the unique imaginary frequency and subsequently reoptimised using 'calcf' option. Intrinsic reaction coordinate (IRC) calculations have also been carried out to authenticate the transition state.<sup>18</sup> Wienhold's Natural Bond orbital analysis has been performed using NBO5.0 program to electron delocalization in detail.<sup>19</sup>

(16) a) Frisch, M. J. *et al.* *Gaussian 98* (Revision A.11.4) Gaussian, Inc., Pittsburgh PA, 2001. b) A. D. Becke, *Phys. Rev. A*, 1998, **38**, 3098. c) A. D. Becke, *J. Chem. Phys.*, 1993, **98**, 5648; d) C. Lee, W. Yang and R. G. Parr, *Phys. Rev. B*, 1998, **37**, 785.

(17) A. P. Scott and L. Radom, *J. Phys. Chem.*, 1996, **100**, 16502-16513.

(18) (a) C. Gonzalez and H. B. Schlegel, *J. Chem. Phys.*, 1989, **90**, 2154. (b) C. Gonzalez and H. B. Schlegel, *J. Phys. Chem.*, 1990, **94**, 5523-5527.

(19) a) F. Wienhold, in *Encyclopedia of computational chemistry*, P. v. R. Schleyer, ed. New York, 1998, **3**, 1792. b) A. E. Reed, L. A. Curtiss and F. Weinhold, *Chem. Rev.*, 1988, **88**, 899-926.

**Table S1.** Key Structural Parameter of spiro DA adduct obtained at the B3LYP/6-31G\* level (bond distance in Å)

| Adduct     | C <sub>1</sub> -C <sub>5</sub> | C <sub>2</sub> -C <sub>6</sub> | C <sub>1</sub> -C <sub>7</sub> | C <sub>1</sub> -C <sub>3</sub> | C <sub>3</sub> -C <sub>4</sub> | C <sub>5</sub> -C <sub>6</sub> | C <sub>7</sub> -C <sub>8</sub> | C <sub>8</sub> -C <sub>9</sub> | C <sub>7</sub> -C <sub>9</sub> |
|------------|--------------------------------|--------------------------------|--------------------------------|--------------------------------|--------------------------------|--------------------------------|--------------------------------|--------------------------------|--------------------------------|
| <b>2a</b>  | 1.583                          | 1.583                          | 1.532                          | 1.523                          | 1.341                          | 1.562                          | 1.495                          | 1.521                          | 1.499                          |
| <b>2b</b>  | 1.584                          | 1.584                          | 1.532                          | 1.522                          | 1.341                          | 1.553                          | 1.495                          | 1.522                          | 1.500                          |
| <b>2c</b>  | 1.587                          | 1.585                          | 1.532                          | 1.522                          | 1.341                          | 1.556                          | 1.495                          | 1.522                          | 1.500                          |
| <b>2d</b>  | 1.584                          | 1.584                          | 1.532                          | 1.522                          | 1.341                          | 1.559                          | 1.495                          | 1.522                          | 1.500                          |
| <b>2e</b>  | 1.584                          | 1.584                          | 1.532                          | 1.522                          | 1.341                          | 1.560                          | 1.496                          | 1.522                          | 1.499                          |
| <b>3a1</b> | 1.583                          | 1.584                          | 1.534                          | 1.522                          | 1.341                          | 1.561                          | 1.498                          | 1.522                          | 1.505                          |
| <b>3a2</b> | 1.583                          | 1.583                          | 1.534                          | 1.522                          | 1.341                          | 1.561                          | 1.500                          | 1.524                          | 1.502                          |
| <b>3b1</b> | 1.584                          | 1.585                          | 1.534                          | 1.521                          | 1.341                          | 1.552                          | 1.498                          | 1.522                          | 1.505                          |
| <b>3b2</b> | 1.583                          | 1.584                          | 1.534                          | 1.522                          | 1.341                          | 1.552                          | 1.500                          | 1.524                          | 1.502                          |
| <b>3d1</b> | 1.584                          | 1.585                          | 1.533                          | 1.522                          | 1.341                          | 1.558                          | 1.498                          | 1.522                          | 1.505                          |
| <b>3d2</b> | 1.584                          | 1.585                          | 1.533                          | 1.522                          | 1.341                          | 1.558                          | 1.500                          | 1.524                          | 1.502                          |
| <b>3e1</b> | 1.584                          | 1.585                          | 1.533                          | 1.522                          | 1.341                          | 1.559                          | 1.498                          | 1.522                          | 1.505                          |
| <b>3e2</b> | 1.584                          | 1.585                          | 1.533                          | 1.522                          | 1.341                          | 1.558                          | 1.500                          | 1.523                          | 1.502                          |

**Table S2.** Key Structural Parameter obtained at the B3LYP/6-31G\* level for the Transition State of rDA reaction of spiro DA adduct. (bond distance in Å)

| Adduct     | C <sub>1</sub> -C <sub>5</sub> | C <sub>2</sub> -C <sub>6</sub> | C <sub>1</sub> -C <sub>7</sub> | C <sub>1</sub> -C <sub>3</sub> | C <sub>3</sub> -C <sub>4</sub> | C <sub>5</sub> -C <sub>6</sub> | C <sub>7</sub> -C <sub>8</sub> | C <sub>8</sub> -C <sub>9</sub> | C <sub>7</sub> -C <sub>9</sub> |
|------------|--------------------------------|--------------------------------|--------------------------------|--------------------------------|--------------------------------|--------------------------------|--------------------------------|--------------------------------|--------------------------------|
| <b>2a</b>  | 2.173                          | 2.177                          | 1.493                          | 1.413                          | 1.393                          | 1.417                          | 1.532                          | 1.503                          | 1.502                          |
| <b>2b</b>  | 2.178                          | 2.178                          | 1.493                          | 1.412                          | 1.394                          | 1.412                          | 1.532                          | 1.503                          | 1.502                          |
| <b>2c</b>  | 2.231                          | 2.111                          | 1.490                          | 1.410                          | 1.394                          | 1.417                          | 1.533                          | 1.503                          | 1.503                          |
| <b>2d</b>  | 2.170                          | 2.169                          | 1.493                          | 1.413                          | 1.393                          | 1.417                          | 1.532                          | 1.503                          | 1.502                          |
| <b>2e</b>  | 2.167                          | 2.166                          | 1.493                          | 1.414                          | 1.393                          | 1.419                          | 1.533                          | 1.503                          | 1.502                          |
| <b>3a1</b> | 2.163                          | 2.191                          | 1.494                          | 1.413                          | 1.393                          | 1.416                          | 1.535                          | 1.504                          | 1.510                          |
| <b>3a2</b> | 2.170                          | 2.177                          | 1.493                          | 1.413                          | 1.393                          | 1.417                          | 1.541                          | 1.504                          | 1.504                          |
| <b>3b1</b> | 2.167                          | 2.188                          | 1.494                          | 1.413                          | 1.393                          | 1.412                          | 1.535                          | 1.504                          | 1.510                          |
| <b>3b2</b> | 2.167                          | 2.182                          | 1.493                          | 1.413                          | 1.393                          | 1.412                          | 1.540                          | 1.505                          | 1.504                          |
| <b>3d1</b> | 2.158                          | 2.180                          | 1.494                          | 1.414                          | 1.392                          | 1.418                          | 1.535                          | 1.504                          | 1.510                          |
| <b>3d2</b> | 2.167                          | 2.167                          | 1.493                          | 1.414                          | 1.392                          | 1.418                          | 1.541                          | 1.504                          | 1.504                          |
| <b>3e1</b> | 2.162                          | 2.173                          | 1.494                          | 1.414                          | 1.392                          | 1.418                          | 1.535                          | 1.504                          | 1.510                          |
| <b>3e2</b> | 2.160                          | 2.169                          | 1.493                          | 1.415                          | 1.392                          | 1.419                          | 1.541                          | 1.504                          | 1.504                          |

**Table S3.** Energetics of retro Diels-Alder reaction Spiro DA adduct at the B3LYP/6-311+G\*\*//B3LYP/6-31G\* level of theory.

| Reaction                 | $\Delta E^\ddagger$ | $\Delta G^\ddagger$ | $\Delta H_{298}$ | $\Delta G_{298}$ |
|--------------------------|---------------------|---------------------|------------------|------------------|
| <b>2a→1a</b>             | 26.0                | 23.3                | 3.4              | -11.2            |
| <b>2b→1b</b>             | 25.9                | 22.9                | 2.6              | -12.0            |
| <b>2c→1c</b>             | 24.9                | 22.3                | 2.1              | -12.5            |
| <b>2d→1d</b>             | 25.2                | 22.8                | 1.6              | -12.9            |
| <b>2e→1e</b>             | 25.0                | 22.6                | 0.7              | -13.8            |
| <b>3a<sub>1</sub>→1a</b> | 25.8                | 23.2                | 3.1              | -11.5            |
| <b>3a<sub>2</sub>→1a</b> | 25.6                | 23.2                | 3.3              | -11.3            |
| <b>3b<sub>1</sub>→1b</b> | 25.8                | 23.3                | 2.2              | -12.3            |
| <b>3b<sub>2</sub>→1b</b> | 25.7                | 23.3                | 2.5              | -12.1            |
| <b>3d<sub>1</sub>→1d</b> | 25.0                | 22.4                | 1.1              | -13.6            |

|                          |      |      |     |       |
|--------------------------|------|------|-----|-------|
| <b>3d<sub>2</sub>→1d</b> | 24.9 | 22.4 | 1.5 | -13.0 |
| <b>3e<sub>1</sub>→1e</b> | 24.8 | 22.3 | 0.3 | -14.3 |
| <b>3e<sub>2</sub>→1e</b> | 24.7 | 22.2 | 0.6 | -13.9 |

**Table S4.** Major orbital interactions in spiro DA adduct computed at the NBO/B3LYP/6-311+G\*\*//6-31G\*

| Adduct     | $\sigma(C_7-C_8) \rightarrow \sigma^*(C_1-C_5)$ | $\sigma(C_1-C_5) \rightarrow \sigma^*(C_7-C_8)$ | $\sigma(C_7-C_8) \rightarrow \sigma^*(C_2-C_6)$ | $\sigma(C_2-C_6) \rightarrow \sigma^*(C_7-C_8)$ | Occupancy of $\sigma^*(C_1-C_5)$ | Occupancy of $\sigma^*(C_2-C_6)$ |
|------------|-------------------------------------------------|-------------------------------------------------|-------------------------------------------------|-------------------------------------------------|----------------------------------|----------------------------------|
| <b>2a</b>  | 1.18                                            | 4.82                                            | 1.18                                            | 4.82                                            | 0.03306                          | 0.03306                          |
| <b>2b</b>  | 1.15                                            | 4.84                                            | 1.15                                            | 4.84                                            | 0.03352                          | 0.03352                          |
| <b>2c</b>  | 1.18                                            | 4.85                                            | 1.16                                            | 4.85                                            | 0.03447                          | 0.03316                          |
| <b>2d</b>  | 1.21                                            | 4.85                                            | 1.21                                            | 4.85                                            | 0.03328                          | 0.03327                          |
| <b>2e</b>  | 1.16                                            | 4.86                                            | 1.16                                            | 4.86                                            | 0.03288                          | 0.03252                          |
| <b>3a1</b> | 1.10                                            | 4.23                                            | 1.09                                            | 4.38                                            | 0.03312                          | 0.03358                          |
| <b>3a2</b> | 1.15                                            | 4.54                                            | 1.01                                            | 4.74                                            | 0.03335                          | 0.03350                          |
| <b>3b1</b> | 1.21                                            | 4.85                                            | 1.20                                            | 4.96                                            | 0.03386                          | 0.03397                          |
| <b>3b2</b> | 1.11                                            | 4.57                                            | 1.02                                            | 4.77                                            | 0.03380                          | 0.03376                          |
| <b>3d1</b> | 1.20                                            | 4.83                                            | 1.29                                            | 4.96                                            | 0.03357                          | 0.03342                          |
| <b>3d2</b> | 1.13                                            | 4.79                                            | 1.03                                            | 4.56                                            | 0.03331                          | 0.03339                          |
| <b>3e1</b> | 1.23                                            | 4.85                                            | 1.20                                            | 4.95                                            | 0.03301                          | 0.03327                          |
| <b>3e2</b> | 1.13                                            | 4.57                                            | 1.03                                            | 4.81                                            | 0.03318                          | 0.03337                          |

**Table S5.** Major orbital interactions in spiro DA adduct computed at the NBO/B3LYP/6-311+G\*\*//6-31G\*

| Adduct    | $\pi(C_3-C_4) \rightarrow \sigma^*(C_1-C_5)$ | $\sigma(C_1-C_5) \rightarrow \pi^*(C_3-C_4)$ | $\pi(C_3-C_4) \rightarrow \sigma^*(C_2-C_6)$ | $\sigma(C_2-C_6) \rightarrow \pi^*(C_3-C_4)$ | Sum of delocalization energy of major interactions |
|-----------|----------------------------------------------|----------------------------------------------|----------------------------------------------|----------------------------------------------|----------------------------------------------------|
| <b>2a</b> | 3.35                                         | 2.73                                         | 3.35                                         | 2.74                                         | 19.35                                              |
| <b>2b</b> | 3.30                                         | 2.71                                         | 3.30                                         | 2.70                                         | 19.15                                              |
| <b>2c</b> | 3.32                                         | 2.71                                         | 3.40                                         | 2.68                                         | 19.3                                               |
| <b>2d</b> | 3.35                                         | 2.70                                         | 3.35                                         | 2.70                                         | 19.37                                              |



|            |      |      |      |      |       |
|------------|------|------|------|------|-------|
| <b>2e</b>  | 3.29 | 2.72 | 3.29 | 2.72 | 19.2  |
| <b>3a1</b> | 3.37 | 2.72 | 3.37 | 2.72 | 18.6  |
| <b>3a2</b> | 3.32 | 2.68 | 3.35 | 2.69 | 18.74 |
| <b>3b1</b> | 3.34 | 2.70 | 3.32 | 2.71 | 19.33 |
| <b>3b2</b> | 3.32 | 2.71 | 3.34 | 2.71 | 18.78 |
| <b>3d1</b> | 3.31 | 2.72 | 3.37 | 2.69 | 19.41 |
| <b>3d2</b> | 3.35 | 2.72 | 3.32 | 2.72 | 19.06 |
| <b>3e1</b> | 3.31 | 2.72 | 3.32 | 2.72 | 19.35 |
| <b>3e2</b> | 3.30 | 2.73 | 3.35 | 2.72 | 18.83 |

**Table S6.** Major orbital interactions in Transition state computed at the NBO/B3LYP/6-311+G\*\*//6-31G\*

| Adduct     | $\sigma(C_7-C_8) \rightarrow \sigma^*(C_1-C_5)$ | $\sigma(C_1-C_5) \rightarrow \sigma^*(C_7-C_8)$ | $\sigma(C_7-C_8) \rightarrow \sigma^*(C_2-C_6)$ | $\sigma(C_2-C_5) \rightarrow \sigma^*(C_7-C_8)$ | Occupancy of $\sigma^*(C_1-C_5)$ | Occupancy of $\sigma^*(C_2-C_6)$ |
|------------|-------------------------------------------------|-------------------------------------------------|-------------------------------------------------|-------------------------------------------------|----------------------------------|----------------------------------|
| <b>2a</b>  | 2.84                                            | 7.28                                            | 2.85                                            | 7.32                                            | 0.3577                           | 0.3595                           |
| <b>2b</b>  | 2.81                                            | 7.34                                            | 2.81                                            | 7.34                                            | 0.3616                           | 0.3616                           |
| <b>2c</b>  | -                                               | -                                               | -                                               | -                                               | -                                | -                                |
| <b>2d</b>  | 2.81                                            | 7.33                                            | 2.80                                            | 7.36                                            | 0.3558                           | 0.3555                           |
| <b>2e</b>  | 2.82                                            | 7.39                                            | 2.82                                            | 7.39                                            | 0.3535                           | 0.3531                           |
| <b>3a1</b> | 2.85                                            | 6.95                                            | 2.85                                            | 7.23                                            | 0.3543                           | 0.3644                           |
| <b>3a2</b> | 2.96                                            | 6.69                                            | 2.62                                            | 7.58                                            | 0.3566                           | 0.3608                           |
| <b>3b1</b> | 3.01                                            | 7.29                                            | 3.01                                            | 7.54                                            | 0.3574                           | 0.3652                           |
| <b>3b2</b> | 2.88                                            | 6.72                                            | 2.58                                            | 7.63                                            | 0.3568                           | 0.3628                           |
| <b>3d1</b> | 2.82                                            | 7.04                                            | 2.83                                            | 7.28                                            | 0.3511                           | 0.3586                           |
| <b>3d2</b> | 2.93                                            | 6.76                                            | 2.58                                            | 7.63                                            | 0.3544                           | 0.3551                           |
| <b>3e1</b> | 3.02                                            | 7.33                                            | 3.02                                            | 7.56                                            | 0.3523                           | 0.3569                           |
| <b>3e2</b> | 2.91                                            | 6.78                                            | 2.60                                            | 7.68                                            | 0.3513                           | 0.3552                           |

**Table S7.** Major orbital interactions in Transition state computed at the NBO/B3LYP/6-311+G\*\*//6-31G\*

| Adduct     | $\pi(\text{C}_3\text{-C}_4) \rightarrow$<br>$\sigma^*(\text{C}_1\text{-C}_5)$ | $\sigma(\text{C}_1\text{-C}_5) \rightarrow$<br>$\pi^*(\text{C}_3\text{-C}_4)$ | $\pi(\text{C}_3\text{-C}_4) \rightarrow$<br>$\sigma^*(\text{C}_2\text{-C}_6)$ | $\sigma(\text{C}_2\text{-C}_6) \rightarrow$<br>$\pi^*(\text{C}_3\text{-C}_4)$ | Sum of delocalization<br>energy of major<br>interactions |
|------------|-------------------------------------------------------------------------------|-------------------------------------------------------------------------------|-------------------------------------------------------------------------------|-------------------------------------------------------------------------------|----------------------------------------------------------|
| <b>2a</b>  | 17.44                                                                         | 15.87                                                                         | 17.55                                                                         | 15.98                                                                         | 79.81                                                    |
| <b>2b</b>  | 17.45                                                                         | 16.29                                                                         | 17.45                                                                         | 16.29                                                                         | 80.44                                                    |
| <b>2c</b>  | -                                                                             | -                                                                             | -                                                                             | -                                                                             |                                                          |
| <b>2d</b>  | 17.33                                                                         | 15.86                                                                         | 17.34                                                                         | 15.83                                                                         | 79.3                                                     |
| <b>2e</b>  | 17.19                                                                         | 15.81                                                                         | 17.17                                                                         | 15.79                                                                         | 78.99                                                    |
| <b>3a1</b> | 17.08                                                                         | 15.83                                                                         | 17.36                                                                         | 16.55                                                                         | 79.47                                                    |
| <b>3a2</b> | 17.34                                                                         | 15.72                                                                         | 17.46                                                                         | 16.00                                                                         | 78.79                                                    |
| <b>3b1</b> | 17.28                                                                         | 15.96                                                                         | 17.38                                                                         | 16.56                                                                         | 80.49                                                    |
| <b>3b2</b> | 17.17                                                                         | 15.92                                                                         | 17.40                                                                         | 16.45                                                                         | 79.12                                                    |
| <b>3d1</b> | 16.96                                                                         | 15.75                                                                         | 17.04                                                                         | 16.35                                                                         | 78.79                                                    |
| <b>3d2</b> | 17.22                                                                         | 15.68                                                                         | 17.21                                                                         | 15.84                                                                         | 78.22                                                    |
| <b>3e1</b> | 17.14                                                                         | 15.62                                                                         | 17.11                                                                         | 15.96                                                                         | 79.2                                                     |
| <b>3e2</b> | 17.03                                                                         | 15.54                                                                         | 17.04                                                                         | 15.88                                                                         | 77.78                                                    |

**Table S8.** Cartesian Coordinates of the B3LYP/6-31G\* Optimized Geometry of Cycloadducts Formed between Spiro Cyclopentadiene and various Quinone and respective Transition states of retro Diels-Alder reaction. The Values in Parenthesis Implies Single-Point Energies Evaluated at the **B3LYP/6-311+G\*\*//B3LYP/6-31G\*** Level

| <b>2a</b> HF = -652.9588094 (-653.1349222)<br>Nimag = 0 | <b>2a<sup>†</sup></b> HF = -652.9142084 (-653.0934312)<br>Nimag = 1(-460.15)   |
|---------------------------------------------------------|--------------------------------------------------------------------------------|
| 6 -1.947612 -0.000032 -0.098665                         | 6 1.953654 .000446 -.010275                                                    |
| 6 -.985256 1.129997 .282519                             | 6 1.158263 -1.149842 .512073                                                   |
| 6 -.569291 .670384 1.673149                             | 6 .542865 -.698344 1.701184                                                    |
| 6 -.569493 -.670812 1.673113                            | 6 .543323 .694895 1.703245                                                     |
| 6 -.985326 -1.130174 .282379                            | 6 1.159896 1.149565 .516247                                                    |
| 6 .213140 -.781030 -.691427                             | 6 3.484217 -.000974 .061382                                                    |
| 6 .213024 .780950 -.691543                              | 6 2.778767 .002221 -1.265909                                                   |
| 6 1.500463 -1.486115 -.300864                           | 6 -.384194 .708823 -.954003                                                    |
| 6 2.703421 -.672387 -.000600                            | 6 -1.525379 1.461529 -.388452                                                  |
| 6 2.703322 .672778 -.000686                             | 6 -2.531608 .672433 .374359                                                    |
| 6 1.500374 1.486302 -.301550                            | 6 -2.531554 -.672495 .374162                                                   |
| 8 1.554305 -2.706312 -.234820                           | 6 -1.525222 -1.461026 -.388916                                                 |
| 8 1.553638 2.706457 -.234289                            | 6 -.383445 -.707878 -.953752                                                   |
| 6 -3.424287 -.000033 .135419                            | 1 1.396517 -2.188143 .304250                                                   |
| 6 -2.869544 .000035 -1.281574                           | 1 .037246 -1.332933 2.420252                                                   |
| 1 -1.331094 2.159949 .184160                            | 1 .037854 1.327680 2.424003                                                    |
| 1 -2.42184 1.331075 2.469144                            | 1 1.397244 2.188403 .310248                                                    |
| 1 -2.42534 -1.331647 2.469047                           | 1 3.970389 .910838 .395593                                                     |
| 1 -1.331196 -2.160096 .183828                           | 1 3.968612 -.915055 .391970                                                    |
| 1 -.046354 -1.154861 -1.689067                          | 1 2.798582 -.909735 -1.857990                                                  |
| 1 3.597394 -1.243535 .239606                            | 1 2.799838 .916627 -1.854156                                                   |
| 1 3.597191 1.244086 .239525                             | 1 .152911 1.241276 -1.733186                                                   |
| 1 -.046775 1.154644 -1.689149                           | 8 -1.660164 2.673470 -.532320                                                  |
| 1 -3.890160 -.912228 .500123                            | 1 -3.295626 1.252872 .886073                                                   |
| 1 -3.890153 .912137 .500197                             | 1 -3.295500 -1.253221 .885652                                                  |
| 1 -2.967644 .912534 -1.866226                           | 8 -1.659553 -2.672850 -.533472                                                 |
| 1 -2.967645 -.912395 -1.866334                          | 1 .152180 -1.239701 -1.734436                                                  |
| <b>2b</b> HF = -731.59905(-731.7938698)<br>Nimag = 0    | <b>2b<sup>†</sup></b> HF = -731.5546893 (-731.7524681)<br>Nimag = -1 (-461.80) |
| 6 -0.945998 -1.475902 -0.377812                         | 6 2.442569 -0.000109 0.154486                                                  |
| 6 0.353187 -0.776504 -0.721780                          | 6 1.585771 -1.150076 0.569543                                                  |
| 6 0.353259 0.776433 -0.721792                           | 6 0.817796 -0.697212 1.664552                                                  |
| 6 -0.945881 1.475925 -0.377809                          | 6 0.817819 0.696808 1.664679                                                   |
| 6 -2.186770 0.680559 -0.132964                          | 6 1.585805 1.149825 0.569759                                                   |
| 6 -2.186811 -0.680480 -0.132932                         | 6 0.249444 0.705817 -1.091405                                                  |
| 6 1.517541 -1.129783 0.291671                           | 6 -0.958364 1.451282 -0.683938                                                 |
| 6 2.492863 -0.000105 -0.056219                          | 6 -2.067502 0.679542 -0.034878                                                 |
| 6 1.517621 1.129638 0.291674                            | 6 -2.067560 -0.679456 -0.034951                                                |
| 6 1.055697 0.670551 1.667626                            | 6 -0.958424 -1.451204 -0.683996                                                |

|                                                                  |                                                                                         |
|------------------------------------------------------------------|-----------------------------------------------------------------------------------------|
| 6 1.055659 -0.670672 1.667622                                    | 6 0.249415 -0.705749 -1.091452                                                          |
| 6 3.960931 0.000048 0.226563                                     | 6 3.950280 0.000121 0.426937                                                            |
| 6 3.453401 0.000031 -1.208117                                    | 6 3.425445 0.000150 -0.981682                                                           |
| 8 -0.968593 2.699176 -0.309436                                   | 6 -3.195415 -1.486470 0.550838                                                          |
| 8 -0.968829 -2.699168 -0.309623                                  | 6 -3.195308 1.486573 0.550985                                                           |
| 1 1.865140 -2.159993 0.203988                                    | 1 1.848644 -2.188570 0.395255                                                           |
| 1 0.701334 -1.331644 2.451655                                    | 1 0.222027 -1.331016 2.311722                                                           |
| 1 0.701414 1.331537 2.451666                                     | 1 0.222069 1.330511 2.311966                                                            |
| 1 1.865321 2.159818 0.204037                                     | 1 1.848828 2.188334 0.395777                                                            |
| 1 0.645238 1.153970 -1.709132                                    | 1 0.880969 1.243281 -1.792366                                                           |
| 1 0.645190 -1.154088 -1.709092                                   | 8 -1.054656 2.663652 -0.865701                                                          |
| 1 4.414405 0.912305 0.606527                                     | 1 -3.010235 2.551048 0.398153                                                           |
| 1 4.414686 -0.912129 0.606380                                    | 1 -4.153768 1.227914 0.083148                                                           |
| 1 3.570527 -0.912487 -1.789241                                   | 1 -3.306670 1.291591 1.625552                                                           |
| 6 -3.439157 1.471622 0.138802                                    | 1 -4.154197 -1.226139 0.084627                                                          |
| 1 -3.847332 1.235881 1.129871                                    | 1 -3.011389 -2.550849 0.396083                                                          |
| 1 -3.225506 2.540049 0.092335                                    | 1 -3.305305 -1.293227 1.625886                                                          |
| 1 -4.222974 1.231626 -0.590671                                   | 8 -1.054696 -2.663574 -0.865767                                                         |
| 6 -3.439258 -1.471447 0.138979                                   | 1 0.880835 -1.243203 -1.792510                                                          |
| 1 -3.846926 -1.235948 1.130315                                   | 1 4.387837 -0.912904 0.819927                                                           |
| 1 -4.223352 -1.231095 -0.590062                                  | 1 4.387499 0.913172 0.820235                                                            |
| 1 -3.225758 -2.539885 0.092129                                   | 1 3.523799 -0.912847 -1.564317                                                          |
| 1 3.570268 0.912536 -1.789309                                    | 1 3.523258 0.913238 -1.564263                                                           |
| <b>2c</b> HF = -881.8510128 ( <b>-882.0881456</b> )<br>Nimag = 0 | <b>2c<sup>†</sup></b> HF = -881.808135 ( <b>-882.0483477</b> )<br>Nimag = 1 (-460.7393) |
| 6 -0.523814 -1.272974 -0.481253                                  | 6 2.924381 -0.168809 0.283738                                                           |
| 6 0.849580 -0.704014 -0.753181                                   | 6 1.939021 -1.224061 0.650443                                                           |
| 6 1.012125 0.843485 -0.756389                                    | 6 1.125467 -0.679762 1.666009                                                           |
| 6 -0.214834 1.691374 -0.477554                                   | 6 1.256947 0.706414 1.649308                                                            |
| 6 1.915007 -1.168949 0.326619                                    | 6 2.143656 1.065739 0.603447                                                            |
| 6 3.020139 -0.151180 0.025341                                    | 6 0.943220 0.784246 -1.109748                                                           |
| 6 2.153352 1.077807 0.318108                                     | 6 -0.199746 1.679278 -0.803129                                                          |
| 6 1.573897 0.682443 1.668979                                     | 6 -1.445438 1.035947 -0.277814                                                          |
| 6 1.432106 -0.651221 1.673869                                    | 6 -2.469766 1.844728 0.205143                                                           |
| 6 4.463640 -0.303152 0.384969                                    | 6 -3.652027 1.257374 0.670735                                                           |
| 6 4.034108 -0.260264 -1.074190                                   | 6 -3.826338 -0.120152 0.638426                                                          |
| 8 -0.112994 2.910463 -0.466403                                   | 6 -2.810012 -0.950688 0.134653                                                          |
| 8 -0.653246 -2.510150 -0.484049                                  | 6 -1.593349 -0.373294 -0.312454                                                         |
| 1 2.155638 -2.230803 0.259593                                    | 6 -0.520724 -1.238591 -0.833827                                                         |
| 1 0.969350 -1.263160 2.441007                                    | 6 0.769787 -0.621612 -1.152022                                                          |
| 1 1.250330 1.383443 2.431126                                     | 6 4.400395 -0.293473 0.678173                                                           |
| 1 2.611680 2.064929 0.244921                                     | 6 3.991548 -0.284744 -0.767791                                                          |
| 1 1.395994 1.177098 -1.727351                                    | 1 2.100857 -2.285014 0.491190                                                           |
| 1 1.158671 -1.118365 -1.719949                                   | 1 0.419512 -1.240989 2.267504                                                           |
| 1 4.990103 0.558841 0.787344                                     | 1 0.672011 1.404728 2.236733                                                            |
| 1 4.798414 -1.255356 0.789202                                    | 1 2.531591 2.069644 0.460492                                                            |

|                                                        |                                                                               |
|--------------------------------------------------------|-------------------------------------------------------------------------------|
| 1 4.086007 -1.183869 -1.647186                         | 1 1.678529 1.239191 -1.767238                                                 |
| 6 -2.942745 -0.956150 0.032021                         | 8 -0.122349 2.893194 -0.962960                                                |
| 6 -1.662580 -0.387792 -0.223074                        | 1 -2.330467 2.920160 0.200891                                                 |
| 6 -1.528579 1.027079 -0.218315                         | 1 -4.451730 1.886304 1.053185                                                 |
| 6 -2.630161 1.839868 0.030263                          | 1 -4.744383 -0.586169 0.982246                                                |
| 6 -3.881087 1.262577 0.277919                          | 8 -3.029943 -2.272785 0.095597                                                |
| 6 -4.041737 -0.115188 0.280205                         | 1 -2.226076 -2.674759 -0.337698                                               |
| 1 -2.491184 2.914968 0.025081                          | 8 -0.696629 -2.465585 -0.990896                                               |
| 1 -4.739769 1.900243 0.470569                          | 1 1.404258 -1.224780 -1.793320                                                |
| 1 -5.004955 -0.577820 0.469964                         | 1 4.721576 -1.230422 1.123514                                                 |
| 8 -3.152666 -2.277696 0.046329                         | 1 4.883650 0.588046 1.089112                                                  |
| 1 -2.273833 -2.705231 -0.148067                        | 1 4.054344 -1.217401 -1.323540                                                |
| 1 4.274300 0.631641 -1.649285                          | 1 4.215561 0.601636 -1.356730                                                 |
| <b>2d</b> HF = -806.6203381(-806.8285449)<br>Nimag = 0 | <b>2d<sup>†</sup></b> HF = -806.5769886 (-806.7882837)<br>Nimag = 1 (-468.58) |
| 6 -.558856 -1.500029 -.451690                          | 6 2.762199 0.000636 0.287153                                                  |
| 6 .744896 -.779463 -.744146                            | 6 1.874979 -1.150876 0.627373                                                 |
| 6 .744903 .779462 -.744133                             | 6 1.021033 -0.700312 1.659431                                                 |
| 6 -.558846 1.500033 -.451689                           | 6 1.018757 0.692617 1.661186                                                  |
| 6 1.869442 -1.129727 .315336                           | 6 1.871270 1.148546 0.630167                                                  |
| 6 2.856944 -.000027 .005830                            | 6 0.683346 0.708442 -1.130363                                                 |
| 6 1.869456 1.129693 .315349                            | 6 -0.543247 1.476063 -0.827193                                                |
| 6 1.352079 .670590 1.671516                            | 6 -1.706050 0.704954 -0.284349                                                |
| 6 1.352065 -.670629 1.671507                           | 6 -2.824845 1.399362 0.191931                                                 |
| 6 4.313059 .000030 .346026                             | 6 -3.927430 0.701448 0.676139                                                 |
| 6 3.861759 .000012 -1.107358                           | 6 -3.927880 -0.699581 0.675802                                                |
| 8 -.580177 2.723229 -.418455                           | 6 -2.825730 -1.397970 0.191298                                                |
| 8 -.580195 -2.723224 -.418459                          | 6 -1.706527 -0.704059 -0.284764                                               |
| 1 2.220503 -2.159916 .241539                           | 6 -0.544354 -1.475655 -0.828272                                               |
| 1 .965317 -1.331183 2.440387                           | 6 0.682725 -0.708877 -1.131415                                                |
| 1 .965341 1.331140 2.440405                            | 6 4.242447 0.001148 0.683293                                                  |
| 1 2.220542 2.159875 .241561                            | 6 3.835767 0.003139 -0.763804                                                 |
| 1 1.080657 1.152548 -1.719052                          | 1 2.153303 -2.188773 0.474527                                                 |
| 1 1.080635 -1.152537 -1.719076                         | 1 0.372267 -1.334915 2.252285                                                 |
| 1 4.751247 .912321 .743431                             | 1 0.368112 1.323595 2.255877                                                  |
| 1 4.751371 -.912212 .743406                            | 1 2.146783 2.187779 0.481160                                                  |
| 1 4.000779 -.912624 -1.683368                          | 1 1.377088 1.236571 -1.777642                                                 |
| 6 -2.996689 -1.396688 .023970                          | 8 -0.609241 2.689702 -1.004079                                                |
| 6 -1.799655 -.704896 -.211776                          | 1 -2.805784 2.484224 0.163588                                                 |
| 6 -1.799650 .704905 -.211772                           | 1 -4.792369 1.244070 1.048358                                                 |
| 6 -2.996682 1.396701 .023979                           | 1 -4.793154 -1.241831 1.047787                                                |
| 6 -4.178203 .700667 .253161                            | 1 -2.807376 -2.482830 0.162417                                                |
| 6 -4.178207 -.700650 .253157                           | 8 -0.611398 -2.689156 -1.005979                                               |
| 1 -2.968465 -2.481349 .020528                          | 1 1.374770 -1.237296 -1.780351                                                |
| 1 -2.968453 2.481362 .020543                           | 1 4.644985 0.913966 1.112542                                                  |
| 1 -5.102042 1.243975 .432433                           | 1 4.646277 -0.912093 1.110391                                                 |

|                                             |                                                         |
|---------------------------------------------|---------------------------------------------------------|
| 1 -5.102048 -1.243954 .432426               | 1 3.980355 0.917781 -1.334049                           |
| 1 4.000703 .912606 -1.683450                | 1 3.981099 -0.908778 -1.338099                          |
| <b>2e</b> HF = -960.2643334 (-960.5057671)  | <b>2e<sup>†</sup></b> HF = -960.2210574 (-960.4658534)  |
| Nimag = 0                                   | Nimag = 1 (-469.17)                                     |
| 6 -0.482144 1.506095 -0.538791              | 6 3.661804 0.000063 0.557470                            |
| 6 -1.798829 0.779773 -0.753181              | 6 2.734625 -1.150212 0.769576                           |
| 6 -1.798830 -0.779770 -0.753184             | 6 1.744502 -0.697665 1.671514                           |
| 6 -0.482146 -1.506093 -0.538785             | 6 1.743768 0.694849 1.672070                            |
| 6 -2.858643 1.129793 0.370817               | 6 2.733276 1.149153 0.770126                            |
| 6 -3.863061 0.000004 0.120171               | 6 1.804111 0.709548 -1.136075                           |
| 6 -2.858650 -1.129793 0.370807              | 6 0.548740 1.481780 -1.011765                           |
| 6 -2.262183 -0.670604 1.693979              | 6 -0.679595 0.714897 -0.635519                          |
| 6 -2.262177 0.670588 1.693983               | 6 -1.834846 1.401960 -0.319624                          |
| 6 -5.297127 -0.000001 0.544409              | 6 -3.026100 0.718277 0.024974                           |
| 6 -4.930678 0.000004 -0.932706              | 6 -4.222550 1.405524 0.366426                           |
| 8 -0.466504 -2.730236 -0.517508             | 6 -5.363688 0.708942 0.693658                           |
| 8 -0.466504 2.730238 -0.517500              | 6 -5.363654 -0.708982 0.693561                          |
| 1 -3.212934 2.160180 0.317973               | 6 -4.222488 -1.405465 0.366215                          |
| 1 -1.830232 1.330922 2.438627               | 6 -3.026069 -0.718115 0.024862                          |
| 1 -1.830243 -1.330946 2.438618              | 6 -1.834797 -1.401698 -0.319873                         |
| 1 -3.212948 -2.160177 0.317955              | 6 -0.679569 -0.714545 -0.635660                         |
| 1 -2.192847 -1.151752 -1.706401             | 6 0.548685 -1.481362 -1.012331                          |
| 1 -2.192853 1.151759 -1.706394              | 6 1.803931 -0.709154 -1.136846                          |
| 1 -5.711860 -0.912250 0.966381              | 6 5.070365 0.000471 1.161919                            |
| 1 -5.711866 0.912246 0.966382               | 6 4.874620 0.001087 -0.328523                           |
| 1 -5.102403 0.912734 -1.499617              | 1 3.031084 -2.188420 0.658971                           |
| 6 1.959993 1.399298 -0.191203               | 1 1.017874 -1.330903 2.167554                           |
| 6 0.770040 0.715043 -0.360679               | 1 1.016410 1.326875 2.168569                            |
| 6 0.770039 -0.715042 -0.360679              | 1 3.028808 2.187791 0.660806                            |
| 6 1.959992 -1.399297 -0.191205              | 1 2.581849 1.235558 -1.682038                           |
| 1 1.933243 2.485182 -0.193786               | 8 0.515750 2.695627 -1.198616                           |
| 1 1.933242 -2.485182 -0.193787              | 1 -1.814615 2.487971 -0.346197                          |
| 1 -5.102395 -0.912723 -1.499624             | 1 -4.219636 2.492630 0.363719                           |
| 6 4.419261 1.406492 0.152474                | 1 -6.272755 1.244435 0.953335                           |
| 6 3.187435 0.718063 -0.019416               | 1 -6.272694 -1.244554 0.953168                          |
| 6 3.187435 -0.718063 -0.019416              | 1 -4.219523 -2.492571 0.363353                          |
| 6 4.419260 -1.406493 0.152472               | 1 -1.814543 -2.487703 -0.346695                         |
| 6 5.594279 -0.709231 0.316406               | 8 0.515498 -2.695132 -1.199773                          |
| 6 5.594280 0.709230 0.316407                | 1 2.581558 -1.234971 -1.682957                          |
| 1 4.415592 2.493444 0.151788                | 1 5.408428 -0.912547 1.643121                           |
| 1 4.415591 -2.493445 0.151786               | 1 5.407505 0.913368 1.644004                            |
| 1 6.530851 -1.244152 0.447050               | 1 5.100474 -0.911795 -0.874673                          |
| 1 6.530851 1.244150 0.447051                | 1 5.099371 0.914762 -0.873843                           |
| <b>3a1</b> HF = -692.2742458 (-692.4605824) | <b>3a1<sup>†</sup></b> HF = -692.2297917 (-692.4193354) |
| Nimag = 0                                   | Nimag = 1 (-461.55)                                     |
| 6 -1.856105 -1.282587 -0.618784             | 6 1.680042 -0.356143 0.356027                           |

|                                                          |           |           |           |                                                                                |           |           |           |
|----------------------------------------------------------|-----------|-----------|-----------|--------------------------------------------------------------------------------|-----------|-----------|-----------|
| 6                                                        | -0.449365 | -0.717769 | -0.711460 | 6                                                                              | 0.672205  | -1.443613 | 0.540487  |
| 6                                                        | -0.264432 | 0.813754  | -0.471989 | 6                                                                              | -0.061479 | -1.113159 | 1.702522  |
| 6                                                        | -1.503391 | 1.630880  | -0.147962 | 6                                                                              | 0.111204  | 0.243493  | 1.965337  |
| 6                                                        | -2.825084 | 0.958345  | -0.132343 | 6                                                                              | 0.960001  | 0.793974  | 0.978849  |
| 6                                                        | -2.984715 | -0.360320 | -0.345291 | 6                                                                              | -0.397660 | 0.831488  | -0.739992 |
| 6                                                        | 0.532159  | -1.357561 | 0.352859  | 6                                                                              | -.517982  | 1.623838  | -0.189460 |
| 6                                                        | 1.675222  | -0.337475 | 0.276521  | 6                                                                              | -2.711111 | 0.861392  | 0.270860  |
| 6                                                        | 0.808528  | 0.859554  | 0.691720  | 6                                                                              | -2.862410 | -0.449724 | 0.012310  |
| 6                                                        | 0.134958  | 0.284299  | 1.930559  | 6                                                                              | -1.845140 | -1.225657 | -0.749032 |
| 6                                                        | -0.031584 | -1.030763 | 1.728232  | 6                                                                              | -0.551616 | -0.551678 | -1.003339 |
| 6                                                        | 3.081733  | -0.597652 | 0.721350  | 1                                                                              | 0.813868  | -2.456727 | 0.177087  |
| 6                                                        | 2.776234  | -0.350760 | -0.749387 | 1                                                                              | -0.748580 | -1.776380 | 2.215722  |
| 8                                                        | -1.421958 | 2.826794  | 0.095776  | 1                                                                              | -.419871  | 0.816577  | 2.717082  |
| 8                                                        | -2.064795 | -2.478645 | -0.767520 | 1                                                                              | 1.340977  | 1.808955  | 1.006249  |
| 1                                                        | 0.761095  | -2.404446 | 0.147719  | 1                                                                              | 0.304858  | 1.414410  | -1.326509 |
| 1                                                        | -0.553686 | -1.736458 | 2.365932  | 8                                                                              | -1.492738 | 2.849434  | -0.113472 |
| 1                                                        | -0.223917 | 0.875098  | 2.766839  | 1                                                                              | -3.474327 | 1.444240  | 0.781080  |
| 1                                                        | 1.278773  | 1.837062  | 0.800185  | 1                                                                              | -3.756042 | -0.998971 | 0.299064  |
| 1                                                        | 0.181572  | 1.280755  | -1.358000 | 8                                                                              | -2.090113 | -2.363522 | -1.139583 |
| 1                                                        | -3.670341 | 1.609403  | 0.079222  | 1                                                                              | 0.034319  | -1.011460 | -1.794043 |
| 1                                                        | -3.965717 | -0.829136 | -0.315251 | 6                                                                              | 3.159482  | -0.626950 | 0.661947  |
| 1                                                        | -0.080980 | -0.988067 | -1.708261 | 6                                                                              | 2.717456  | -0.309843 | -0.740403 |
| 1                                                        | 3.599707  | 0.191016  | 1.263631  | 6                                                                              | 3.141040  | 0.985353  | -1.404031 |
| 1                                                        | 3.352900  | -1.602465 | 1.036734  | 1                                                                              | 3.443604  | -1.644023 | 0.916113  |
| 1                                                        | 2.805458  | -1.240777 | -1.379900 | 1                                                                              | 3.697548  | 0.140073  | 1.213180  |
| 6                                                        | 3.271058  | 0.907037  | -1.436321 | 1                                                                              | 2.684058  | -1.165216 | -1.416050 |
| 1                                                        | 4.314040  | 0.791416  | -1.754961 | 1                                                                              | 3.144086  | 1.820807  | -0.695386 |
| 1                                                        | 2.677473  | 1.143473  | -2.328413 | 1                                                                              | 4.156350  | 0.892067  | -1.806872 |
| 1                                                        | 3.226342  | 1.774044  | -0.767741 | 1                                                                              | 2.477768  | 1.251717  | -2.234756 |
| <b>3a2</b> HF = -692.2747869 (-692.4610435)<br>Nimag = 0 |           |           |           | <b>3a2<sup>†</sup></b> HF = -692.2307602 (-692.4201354)<br>Nimag = 1 (-461.13) |           |           |           |
| 6                                                        | -2.003296 | -1.342563 | -.205529  | 6                                                                              | 1.617765  | -.289764  | -.119465  |
| 6                                                        | -.658159  | -.821021  | -.679630  | 6                                                                              | .708481   | -1.314944 | .472734   |
| 6                                                        | -.460290  | .726115   | -.740015  | 6                                                                              | .208517   | -.757620  | 1.671526  |
| 6                                                        | -1.626270 | 1.603632  | -.319441  | 6                                                                              | .380461   | .623712   | 1.625093  |
| 6                                                        | -2.904819 | .961743   | .070886   | 6                                                                              | .992996   | .963479   | .397247   |
| 6                                                        | -3.075327 | -.371664  | .122812   | 6                                                                              | -.658619  | .671148   | -.991032  |
| 6                                                        | .535264   | -1.287535 | .249433   | 6                                                                              | -1.667687 | 1.578819  | -.402702  |
| 6                                                        | 1.613723  | -.303708  | -.221397  | 6                                                                              | -2.726289 | .946296   | .431637   |
| 6                                                        | .820379   | .952810   | .163184   | 6                                                                              | -2.893828 | -.387203  | .479927   |
| 6                                                        | .423997   | .594085   | 1.588723  | 6                                                                              | -2.032079 | -1.319288 | -.297990  |
| 6                                                        | .255316   | -.735458  | 1.639957  | 6                                                                              | -.833851  | -.733792  | -.938980  |
| 6                                                        | 3.091194  | -.514665  | -.074798  | 6                                                                              | 2.377876  | -.438618  | -1.409027 |
| 6                                                        | 2.451602  | -.470895  | -1.456940 | 6                                                                              | 3.140834  | -.521644  | -.115124  |
| 8                                                        | -1.521975 | 2.822295  | -.300727  | 1                                                                              | .809586   | -2.380600 | .292098   |
| 8                                                        | -2.209329 | -2.543158 | -.094215  | 1                                                                              | -.337418  | -1.303881 | 2.432360  |

|                                                        |           |           |           |                                                                                  |           |           |           |
|--------------------------------------------------------|-----------|-----------|-----------|----------------------------------------------------------------------------------|-----------|-----------|-----------|
| 1                                                      | .743650   | -2.355836 | .174177   | 1                                                                                | -.012529  | 1.335634  | 2.342272  |
| 1                                                      | -.110402  | -1.323073 | 2.475538  | 1                                                                                | 1.332059  | 1.962210  | .144616   |
| 1                                                      | .224700   | 1.316112  | 2.373731  | 1                                                                                | -.096936  | 1.107632  | -1.811536 |
| 1                                                      | 1.277086  | 1.930859  | .010566   | 8                                                                                | -1.655955 | 2.793585  | -.582374  |
| 1                                                      | -.205382  | 1.030431  | -1.762137 | 1                                                                                | -3.386199 | 1.633591  | .955721   |
| 1                                                      | -3.705196 | 1.650583  | .331605   | 1                                                                                | -3.698385 | -.851152  | 1.045559  |
| 1                                                      | -4.020559 | -.815186  | .427629   | 8                                                                                | -2.324291 | -2.508099 | -.392900  |
| 1                                                      | -.497761  | -1.256955 | -1.672842 | 1                                                                                | -.406895  | -1.352717 | -1.722577 |
| 6                                                      | 4.025315  | .586774   | .383219   | 1                                                                                | 2.510618  | .457019   | -2.013101 |
| 1                                                      | 3.379368  | -1.509427 | .265687   | 1                                                                                | 2.228976  | -1.347311 | -1.988272 |
| 1                                                      | 2.373393  | -1.396496 | -2.023997 | 6                                                                                | 4.112023  | .558129   | .309276   |
| 1                                                      | 2.644592  | .408396   | -2.069681 | 1                                                                                | 3.429393  | -1.525327 | .192852   |
| 1                                                      | 5.049324  | .399588   | .038113   | 1                                                                                | 4.188751  | .617361   | 1.400982  |
| 1                                                      | 3.718890  | 1.562969  | -.008796  | 1                                                                                | 5.112717  | .347955   | -.087571  |
| 1                                                      | 4.046957  | .659033   | 1.477160  | 1                                                                                | 3.808630  | 1.543443  | -.059932  |
| <b>3b1</b> HF = -770.9145304 (-771.1195574)<br>Nimag = |           |           |           | <b>3b1<sup>†</sup></b> HF = -770.8702619 (-771.0783511)<br>Nimag = 1 (-458.6466) |           |           |           |
| 6                                                      | -1.258441 | -1.411518 | -0.547931 | 6                                                                                | 2.163561  | -0.302004 | 0.457389  |
| 6                                                      | 0.118899  | -0.793370 | -0.670771 | 6                                                                                | 1.168594  | -1.399373 | 0.650942  |
| 6                                                      | 0.233292  | 0.744951  | -0.503560 | 6                                                                                | 0.337270  | -1.000248 | 1.720885  |
| 6                                                      | -1.039048 | 1.512623  | -0.207814 | 6                                                                                | 0.459457  | 0.377493  | 1.887234  |
| 6                                                      | -2.350861 | 0.800366  | -0.141224 | 6                                                                                | 1.371920  | 0.872974  | 0.929541  |
| 6                                                      | -2.452395 | -0.547787 | -0.300458 | 6                                                                                | 0.154886  | 0.740267  | -0.883710 |
| 6                                                      | 1.129902  | -1.342737 | 0.417857  | 6                                                                                | -1.027053 | 1.533015  | -0.492379 |
| 6                                                      | 2.226702  | -0.278305 | 0.287110  | 6                                                                                | -2.248803 | 0.789151  | -0.044285 |
| 6                                                      | 1.308770  | 0.896975  | 0.650412  | 6                                                                                | -2.350618 | -0.555459 | -0.213896 |
| 6                                                      | 0.667553  | 0.351968  | 1.919218  | 6                                                                                | -1.242971 | -1.338534 | -0.851710 |
| 6                                                      | 0.558553  | -0.977248 | 1.779782  | 6                                                                                | 0.052453  | -0.657691 | -1.051858 |
| 6                                                      | 3.646089  | -0.452057 | 0.733178  | 6                                                                                | 3.620799  | -0.507559 | 0.893074  |
| 6                                                      | 3.321432  | -0.291014 | -0.745386 | 6                                                                                | 3.279860  | -0.317065 | -0.559473 |
| 8                                                      | -0.979769 | 2.723393  | -0.028239 | 1                                                                                | 1.359993  | -2.432954 | 0.379776  |
| 8                                                      | -1.381763 | -2.625917 | -0.656054 | 1                                                                                | -0.373963 | -1.640768 | 2.230140  |
| 1                                                      | 1.402323  | -2.387191 | 0.259290  | 1                                                                                | -0.141864 | 0.992824  | 2.547105  |
| 1                                                      | 0.070389  | -1.674332 | 2.452918  | 1                                                                                | 1.728878  | 1.896774  | 0.906736  |
| 1                                                      | 0.285880  | 0.965336  | 2.728769  | 1                                                                                | 0.885765  | 1.301109  | -1.456739 |
| 1                                                      | 1.733681  | 1.899120  | 0.708676  | 8                                                                                | -1.015360 | 2.762350  | -0.529868 |
| 1                                                      | 0.651441  | 1.195366  | -1.411412 | 6                                                                                | -3.365685 | 1.616758  | 0.533585  |
| 1                                                      | 0.497038  | -1.096411 | -1.654289 | 1                                                                                | -3.076873 | 2.668876  | 0.555964  |
| 1                                                      | 4.129638  | 0.384905  | 1.233292  | 1                                                                                | -4.281129 | 1.520568  | -0.064345 |
| 1                                                      | 3.965654  | -1.426924 | 1.094030  | 1                                                                                | -3.617902 | 1.289717  | 1.550533  |
| 1                                                      | 3.388158  | -1.208662 | -1.331878 | 6                                                                                | -3.588309 | -1.325472 | 0.162598  |
| 6                                                      | -3.558499 | 1.658938  | 0.127649  | 1                                                                                | -3.464294 | -2.379036 | -0.094118 |
| 1                                                      | -4.061710 | 1.352135  | 1.053414  | 1                                                                                | -3.798828 | -1.239030 | 1.236444  |
| 1                                                      | -3.262210 | 2.704581  | 0.218386  | 1                                                                                | -4.471181 | -0.940413 | -0.363551 |
| 1                                                      | -4.296874 | 1.566442  | -0.678810 | 8                                                                                | -1.410785 | -2.508603 | -1.190470 |
| 6                                                      | -3.778617 | -1.256518 | -0.220357 | 1                                                                                | 0.707935  | -1.163205 | -1.754923 |



|                                                          |           |           |           |                                                                               |           |           |           |
|----------------------------------------------------------|-----------|-----------|-----------|-------------------------------------------------------------------------------|-----------|-----------|-----------|
| 1                                                        | -4.241402 | -1.117181 | 0.765147  | 1                                                                             | 3.906902  | -1.492407 | 1.250977  |
| 1                                                        | -4.484608 | -0.858240 | -0.959751 | 1                                                                             | 4.100022  | 0.316121  | 1.416232  |
| 1                                                        | -3.644325 | -2.324429 | -0.396228 | 1                                                                             | 3.313368  | -1.225074 | -1.162458 |
| 6                                                        | 3.751862  | 0.952951  | -1.497731 | 6                                                                             | 3.727362  | 0.929803  | -1.295851 |
| 1                                                        | 3.669463  | 1.849104  | -0.872586 | 1                                                                             | 3.654612  | 1.821541  | -0.663595 |
| 1                                                        | 4.797136  | 0.871517  | -1.819612 | 1                                                                             | 4.773793  | 0.832468  | -1.608114 |
| 1                                                        | 3.141430  | 1.115756  | -2.394846 | 1                                                                             | 3.127595  | 1.106570  | -2.195866 |
| <b>3b2</b> HF = -770.9150397 (-771.1199896)<br>Nimag = 0 |           |           |           | <b>3b2<sup>†</sup></b> HF = -770.8711118 (-771.0790078)<br>Nimag = 1(-460.52) |           |           |           |
| 6                                                        | -1.384776 | -1.458864 | -0.320027 | 6                                                                             | 2.136417  | -0.258673 | -0.028006 |
| 6                                                        | -0.047394 | -0.884530 | -0.738915 | 6                                                                             | 1.205993  | -1.304522 | 0.491808  |
| 6                                                        | 0.081877  | 0.660730  | -0.800810 | 6                                                                             | 0.549957  | -0.734837 | 1.606345  |
| 6                                                        | -1.138488 | 1.480234  | -0.434363 | 6                                                                             | 0.671261  | 0.651132  | 1.532676  |
| 6                                                        | -2.429505 | 0.802650  | -0.108160 | 6                                                                             | 1.408706  | 0.981188  | 0.373737  |
| 6                                                        | -2.543536 | -0.552854 | -0.056952 | 6                                                                             | -0.063051 | 0.572944  | -1.184141 |
| 6                                                        | 1.125405  | -1.295703 | 0.242064  | 6                                                                             | -1.175285 | 1.442025  | -0.752300 |
| 6                                                        | 2.177977  | -0.267004 | -0.189671 | 6                                                                             | -2.307323 | 0.805576  | -0.003311 |
| 6                                                        | 1.312697  | 0.953730  | 0.151989  | 6                                                                             | -2.422698 | -0.546263 | 0.074330  |
| 6                                                        | 0.874511  | 0.585349  | 1.562523  | 6                                                                             | -1.423515 | -1.445299 | -0.589689 |
| 6                                                        | 0.763517  | -0.750201 | 1.615953  | 6                                                                             | -0.182366 | -0.831707 | -1.103492 |
| 6                                                        | 3.655837  | -0.410001 | 0.020505  | 6                                                                             | 3.657200  | -0.425742 | 0.148550  |
| 6                                                        | 3.074186  | -0.401630 | -1.387680 | 6                                                                             | 3.037870  | -0.412296 | -1.222564 |
| 8                                                        | -1.056386 | 2.702779  | -0.415194 | 1                                                                             | 1.369955  | -2.369559 | 0.360324  |
| 8                                                        | -1.507219 | -2.672788 | -0.205733 | 1                                                                             | -0.057894 | -1.281768 | 2.318249  |
| 1                                                        | 1.382825  | -2.354122 | 0.182111  | 1                                                                             | 0.170502  | 1.366447  | 2.175524  |
| 1                                                        | 0.389305  | -1.349787 | 2.439196  | 1                                                                             | 1.734218  | 1.985713  | 0.126815  |
| 1                                                        | 0.609874  | 1.302003  | 2.333019  | 1                                                                             | 0.568615  | 1.015368  | -1.948460 |
| 1                                                        | 1.728832  | 1.951112  | 0.010577  | 8                                                                             | -1.177162 | 2.648095  | -0.993591 |
| 1                                                        | 0.362421  | 0.975853  | -1.812964 | 6                                                                             | -3.326906 | 1.738784  | 0.593380  |
| 1                                                        | 0.172545  | -1.321108 | -1.720452 | 1                                                                             | -3.058683 | 2.773250  | 0.372658  |
| 1                                                        | 3.974163  | -1.389044 | 0.379356  | 1                                                                             | -4.328494 | 1.544181  | 0.189233  |
| 1                                                        | 3.062486  | -1.332396 | -1.951571 | 1                                                                             | -3.395503 | 1.609494  | 1.681334  |
| 6                                                        | -3.598072 | 1.706595  | 0.183681  | 6                                                                             | -3.579029 | -1.220031 | 0.763791  |
| 1                                                        | -3.983732 | 1.538319  | 1.197297  | 1                                                                             | -3.629360 | -0.938361 | 1.823436  |
| 1                                                        | -3.296647 | 2.750636  | 0.091482  | 1                                                                             | -3.479476 | -2.303829 | 0.684857  |
| 1                                                        | -4.428891 | 1.512579  | -0.506383 | 1                                                                             | -4.535749 | -0.925661 | 0.313487  |
| 6                                                        | -3.845289 | -1.224683 | 0.292245  | 8                                                                             | -1.633846 | -2.652110 | -0.697082 |
| 1                                                        | -4.190395 | -0.923391 | 1.289541  | 1                                                                             | 0.354562  | -1.456643 | -1.810777 |
| 1                                                        | -4.636194 | -0.942347 | -0.414016 | 1                                                                             | 3.949681  | -1.407235 | 0.518406  |
| 1                                                        | -3.724356 | -2.308430 | 0.275512  | 6                                                                             | 4.534806  | 0.704985  | 0.639442  |
| 1                                                        | 3.253190  | 0.482748  | -1.997387 | 1                                                                             | 2.987059  | -1.343171 | -1.782987 |
| 6                                                        | 4.519482  | 0.734343  | 0.510556  | 1                                                                             | 3.199204  | 0.470332  | -1.838536 |
| 1                                                        | 4.492577  | 0.811243  | 1.604069  | 1                                                                             | 4.488741  | 0.799551  | 1.730446  |
| 1                                                        | 5.564434  | 0.592839  | 0.209061  | 1                                                                             | 5.580388  | 0.524275  | 0.361443  |
| 1                                                        | 4.185827  | 1.694397  | 0.101356  | 1                                                                             | 4.238073  | 1.666151  | 0.206595  |
| <b>3d1</b> HF = -845.9358462 (-846.1540822)              |           |           |           | <b>3d1<sup>†</sup></b> HF = -845.8925771 (-846.1141837)                       |           |           |           |

| Nimag = 0  |                                |           |           | Nimag = 1(-465.91)     |                                  |           |           |
|------------|--------------------------------|-----------|-----------|------------------------|----------------------------------|-----------|-----------|
| 6          | -0.857357                      | -1.473757 | -0.571566 | 6                      | 2.478540                         | -0.277164 | 0.532576  |
| 6          | .504093                        | -.811585  | -.679383  | 6                      | 1.485192                         | -1.381762 | 0.688344  |
| 6          | .589740                        | .735705   | -.518900  | 6                      | 0.592322                         | -0.973129 | 1.705842  |
| 6          | -.691104                       | 1.503132  | -.243947  | 6                      | 0.690463                         | 0.407600  | 1.852979  |
| 6          | 1.510688                       | -1.334051 | .426972   | 6                      | 1.648972                         | 0.896869  | 0.935755  |
| 6          | 2.589401                       | -.250828  | .306823   | 6                      | 0.542037                         | 0.719945  | -0.933856 |
| 6          | 1.646226                       | .909482   | .650235   | 6                      | -0.656190                        | 1.526436  | -0.622193 |
| 6          | .993753                        | .359824   | 1.911518  | 6                      | -1.895072                        | 0.777580  | -0.240148 |
| 6          | .910697                        | -.971887  | 1.777699  | 6                      | -3.002422                        | 1.486923  | 0.240808  |
| 6          | 4.004794                       | -.397414  | .775555   | 6                      | -4.173217                        | 0.813075  | 0.575983  |
| 6          | 3.699781                       | -.248942  | -.708568  | 6                      | -4.253567                        | -0.576916 | 0.419426  |
| 8          | -.647876                       | 2.716521  | -.090022  | 6                      | -3.162634                        | -1.288324 | -0.071499 |
| 8          | -.950594                       | -2.688225 | -.690677  | 6                      | -1.975914                        | -0.620360 | -0.397457 |
| 1          | 1.804425                       | -2.374208 | .278410   | 6                      | -0.824034                        | -1.401871 | -0.948501 |
| 1          | .422928                        | -1.673666 | 2.446149  | 6                      | 0.464105                         | -0.687831 | -1.081929 |
| 1          | .586909                        | .970288   | 2.710897  | 6                      | 3.909886                         | -0.458162 | 1.057535  |
| 1          | 2.052473                       | 1.919291  | .709700   | 6                      | 3.653509                         | -0.297778 | -0.415656 |
| 1          | 1.017256                       | 1.183554  | -1.423596 | 1                      | 1.702460                         | -2.418043 | 0.448592  |
| 1          | .904632                        | -1.109230 | -1.655603 | 1                      | -0.142200                        | -1.610773 | 2.184347  |
| 1          | 4.465735                       | .450293   | 1.278881  | 1                      | 0.043946                         | 1.027149  | 2.464099  |
| 1          | 4.335705                       | -1.364846 | 1.146015  | 1                      | 1.995889                         | 1.924167  | 0.914634  |
| 1          | 3.791405                       | -1.167946 | -1.289506 | 1                      | 1.302820                         | 1.270114  | -1.477852 |
| 6          | 4.119543                       | .999206   | -1.460054 | 8                      | -0.642252                        | 2.754037  | -0.668383 |
| 1          | 5.170397                       | .934166   | -1.767129 | 1                      | -2.919878                        | 2.565128  | 0.334517  |
| 1          | 3.518900                       | 1.148308  | -2.366077 | 1                      | -5.029016                        | 1.366816  | 0.952968  |
| 1          | 4.013515                       | 1.896225  | -.839707  | 1                      | -5.171491                        | -1.099480 | 0.675289  |
| 6          | -3.312973                      | -1.269127 | -.240443  | 1                      | -3.204233                        | -2.362815 | -0.219417 |
| 6          | -2.065857                      | -.632733  | -.322504  | 8                      | -0.946804                        | -2.582245 | -1.264797 |
| 6          | -1.987609                      | .766470   | -.167727  | 1                      | 1.169364                         | -1.189031 | -1.738621 |
| 6          | -3.157863                      | 1.503059  | .066723   | 1                      | 4.183762                         | -1.433027 | 1.450457  |
| 6          | -4.389138                      | .861956   | .144362   | 1                      | 4.347809                         | 0.380371  | 1.593061  |
| 6          | -4.466926                      | -.528668  | -.009859  | 1                      | 3.731584                         | -1.216261 | -0.998302 |
| 1          | -3.345109                      | -2.346850 | -.362158  | 6                      | 4.130283                         | 0.940633  | -1.147869 |
| 1          | -3.069585                      | 2.578268  | .182715   | 1                      | 3.578826                         | 1.097224  | -2.081921 |
| 1          | -5.291543                      | 1.439960  | .324262   | 1                      | 4.016440                         | 1.842166  | -0.535839 |
| 1          | -5.429622                      | -1.029022 | .050724   | 1                      | 5.192809                         | 0.847380  | -1.401418 |
| <b>3d2</b> | HF = -845.9363213 (-846.15466) |           |           | <b>3d2<sup>†</sup></b> | HF = -845.8934873 (-846.1149238) |           |           |
|            | Nimag = 0                      |           |           |                        | Nimag = 1 (-467.14)              |           |           |
| 6          | 0.969235                       | 1.535356  | -0.403771 | 6                      | -2.474390                        | 0.226559  | 0.065787  |
| 6          | -0.363330                      | 0.913499  | -0.779777 | 6                      | -1.537096                        | 1.283279  | 0.547999  |
| 6          | -0.461357                      | -0.639937 | -0.847577 | 6                      | -0.781538                        | 0.698386  | 1.590409  |
| 6          | 0.781472                       | -1.455319 | -0.540286 | 6                      | -0.868808                        | -0.686734 | 1.478964  |
| 6          | -1.508416                      | 1.289523  | 0.248501  | 6                      | -1.680732                        | -1.002075 | 0.364476  |
| 6          | -2.551714                      | 0.237317  | -0.144698 | 6                      | -0.358238                        | -0.508243 | -1.279323 |
| 6          | -.645216                       | -0.963074 | 0.155458  | 6                      | 0.792835                         | -1.383119 | -0.972050 |

|                                                          |           |           |           |                                                                                |           |           |           |
|----------------------------------------------------------|-----------|-----------|-----------|--------------------------------------------------------------------------------|-----------|-----------|-----------|
| 6                                                        | -1.156623 | -0.589947 | 1.548103  | 6                                                                              | 1.968072  | -0.742999 | -0.300879 |
| 6                                                        | -1.076206 | 0.747750  | 1.603733  | 6                                                                              | 3.005294  | -1.551402 | 0.180162  |
| 6                                                        | -4.022776 | 0.343520  | 0.128730  | 6                                                                              | 4.117973  | -0.975052 | 0.785946  |
| 6                                                        | -3.501057 | 0.352999  | -1.302721 | 6                                                                              | 4.211061  | 0.417881  | 0.904179  |
| 8                                                        | 0.724499  | -2.677704 | -0.562602 | 6                                                                              | 3.191341  | 1.229724  | 0.415893  |
| 8                                                        | 1.065716  | 2.751978  | -0.312207 | 6                                                                              | 2.061783  | 0.657944  | -0.182224 |
| 1                                                        | -1.793760 | 2.341551  | 0.204057  | 6                                                                              | 0.990310  | 1.551665  | -0.725790 |
| 1                                                        | -0.680976 | 1.352672  | 2.413068  | 6                                                                              | -0.262867 | 0.901433  | -1.162917 |
| 1                                                        | -0.841271 | -1.302753 | 2.302896  | 6                                                                              | -3.980798 | 0.338262  | 0.370559  |
| 1                                                        | -2.042990 | -1.969585 | 0.026072  | 6                                                                              | -3.475254 | 0.389602  | -1.045343 |
| 1                                                        | -0.783042 | -0.950407 | -1.848688 | 1                                                                              | -1.739350 | 2.346550  | 0.464772  |
| 1                                                        | -0.633146 | 1.347489  | -1.749862 | 1                                                                              | -0.133960 | 1.239706  | 2.270632  |
| 1                                                        | -4.349053 | 1.313735  | 0.504004  | 1                                                                              | -0.297260 | -1.405252 | 2.055495  |
| 1                                                        | -3.537094 | 1.284827  | -1.863945 | 1                                                                              | -1.996712 | -2.007998 | 0.110768  |
| 6                                                        | 3.375035  | 1.254916  | 0.157495  | 1                                                                              | -1.042701 | -0.932020 | -2.008151 |
| 6                                                        | 2.147452  | 0.652432  | -0.153927 | 8                                                                              | 0.788265  | -2.580890 | -1.244669 |
| 6                                                        | 2.058964  | -0.753244 | -0.217565 | 1                                                                              | 2.916184  | -2.626428 | 0.059652  |
| 6                                                        | 3.199726  | -1.530162 | 0.031713  | 1                                                                              | 4.919012  | -1.606152 | 1.161708  |
| 6                                                        | 4.412369  | -0.922149 | 0.336279  | 1                                                                              | 5.084298  | 0.865385  | 1.371429  |
| 6                                                        | 4.500355  | 0.474994  | 0.399273  | 1                                                                              | 3.247049  | 2.311948  | 0.477607  |
| 1                                                        | 3.415058  | 2.338314  | 0.201873  | 8                                                                              | 1.149690  | 2.767577  | -0.796893 |
| 1                                                        | 3.103818  | -2.609631 | -0.021813 | 1                                                                              | -0.873864 | 1.527071  | -1.806781 |
| 1                                                        | 5.292304  | -1.530999 | 0.525528  | 1                                                                              | -4.270957 | 1.296937  | 0.797560  |
| 1                                                        | 5.448521  | 0.949529  | 0.637191  | 6                                                                              | -4.780779 | -0.836211 | 0.890123  |
| 1                                                        | -3.683759 | -0.534409 | -1.906945 | 1                                                                              | -3.499356 | 1.338983  | -1.575924 |
| 6                                                        | -4.837506 | -0.822532 | 0.650401  | 1                                                                              | -3.660349 | -0.477853 | -1.676151 |
| 1                                                        | -4.763932 | -0.901110 | 1.741677  | 1                                                                              | -5.850312 | -0.681362 | 0.702157  |
| 1                                                        | -5.897078 | -0.705725 | 0.392382  | 1                                                                              | -4.644314 | -0.964121 | 1.970053  |
| 1                                                        | -4.497759 | -1.773328 | 0.224790  | 1                                                                              | -4.490070 | -1.772286 | 0.401849  |
| <b>3e1</b> HF = -999.5798199 (-999.8314113)<br>Nimag = 0 |           |           |           | <b>3e1<sup>†</sup></b> HF = -999.5366638 (-999.8319376)<br>Nimag = 1 (-468.72) |           |           |           |
| 6                                                        | -0.193220 | 1.531374  | -0.572890 | 6                                                                              | 3.385141  | -0.224387 | 0.699163  |
| 6                                                        | -1.540966 | 0.837758  | -0.668342 | 6                                                                              | 2.398253  | -1.339735 | 0.812901  |
| 6                                                        | -1.590594 | -0.715530 | -0.545377 | 6                                                                              | 1.404860  | -0.899923 | 1.717783  |
| 6                                                        | -0.289699 | -1.468227 | -0.323801 | 6                                                                              | 1.467879  | 0.487854  | 1.805387  |
| 6                                                        | -2.532603 | 1.310302  | 0.472716  | 6                                                                              | 2.502169  | 0.951261  | 0.959344  |
| 6                                                        | -3.589742 | 0.206067  | 0.353187  | 6                                                                              | 1.589166  | 0.666698  | -0.992435 |
| 6                                                        | -2.612853 | -0.940342 | 0.644985  | 6                                                                              | 0.358781  | 1.472459  | -0.841051 |
| 6                                                        | -1.940764 | -0.405891 | 1.902601  | 6                                                                              | -0.905210 | 0.726247  | -0.551448 |
| 6                                                        | -1.891194 | 0.930215  | 1.799481  | 6                                                                              | -2.046034 | 1.431469  | -0.223472 |
| 6                                                        | -4.995750 | 0.309855  | 0.860342  | 6                                                                              | -3.270681 | 0.769672  | 0.036042  |
| 6                                                        | -4.725074 | 0.202694  | -0.634056 | 6                                                                              | -4.453983 | 1.475108  | 0.386120  |
| 8                                                        | -0.312599 | -2.686613 | -0.204079 | 6                                                                              | -5.629010 | 0.799984  | 0.626898  |
| 8                                                        | -0.136816 | 2.751410  | -0.659998 | 6                                                                              | -5.677581 | -0.613633 | 0.527679  |
| 1                                                        | -2.852977 | 2.346722  | 0.356774  | 6                                                                              | -4.550148 | -1.327269 | 0.189789  |
| 1                                                        | -1.402070 | 1.626919  | 2.472221  | 6                                                                              | -3.319801 | -0.662355 | -0.064118 |

|                                                                   |           |           |           |                                                                                         |           |           |           |
|-------------------------------------------------------------------|-----------|-----------|-----------|-----------------------------------------------------------------------------------------|-----------|-----------|-----------|
| 1                                                                 | -1.499764 | -1.025743 | 2.676252  | 6                                                                                       | -2.141372 | -1.363697 | -0.417367 |
| 1                                                                 | -2.994995 | -1.960260 | 0.690207  | 6                                                                                       | -0.953683 | -0.698976 | -0.649633 |
| 1                                                                 | -2.033495 | -1.148336 | -1.450012 | 6                                                                                       | 0.259693  | -1.482589 | -1.040286 |
| 1                                                                 | -1.969801 | 1.150066  | -1.627908 | 6                                                                                       | 1.542714  | -0.747933 | -1.081946 |
| 1                                                                 | -5.425269 | -0.559320 | 1.354830  | 6                                                                                       | 4.759474  | -0.349572 | 1.371750  |
| 1                                                                 | -5.338447 | 1.260796  | 1.261579  | 6                                                                                       | 4.649066  | -0.266007 | -0.126056 |
| 1                                                                 | -4.851594 | 1.132620  | -1.190544 | 1                                                                                       | 2.652610  | -2.381795 | 0.646009  |
| 6                                                                 | 2.256356  | 1.367518  | -0.310254 | 1                                                                                       | 0.636855  | -1.527983 | 2.154562  |
| 6                                                                 | 1.039317  | 0.713921  | -0.377018 | 1                                                                                       | 0.756098  | 1.122844  | 2.320526  |
| 6                                                                 | 0.993748  | -0.710554 | -0.259265 | 1                                                                                       | 2.834614  | 1.982902  | 0.921978  |
| 6                                                                 | 2.167313  | -1.420309 | -0.080523 | 1                                                                                       | 2.393664  | 1.201896  | -1.486333 |
| 1                                                                 | 2.264116  | 2.449915  | -0.401056 | 8                                                                                       | 0.372143  | 2.697113  | -0.941739 |
| 1                                                                 | 2.105936  | -2.501322 | 0.006370  | 1                                                                                       | -1.987978 | 2.515340  | -0.174873 |
| 6                                                                 | 4.726559  | 1.316261  | -0.062861 | 1                                                                                       | -4.413860 | 2.559038  | 0.459120  |
| 6                                                                 | 3.467459  | 0.659721  | -0.130313 | 1                                                                                       | -6.527711 | 1.349304  | 0.893688  |
| 6                                                                 | 3.421920  | -0.770836 | -0.012630 | 1                                                                                       | -6.612903 | -1.132213 | 0.719624  |
| 6                                                                 | 4.637394  | -1.485848 | 0.167032  | 1                                                                                       | -4.584250 | -2.411017 | 0.111353  |
| 6                                                                 | 5.839754  | -0.819189 | 0.227861  | 1                                                                                       | -2.157004 | -2.445465 | -0.517823 |
| 6                                                                 | 5.884655  | 0.593798  | 0.112027  | 8                                                                                       | 0.192364  | -2.680406 | -1.305226 |
| 1                                                                 | 4.757396  | 2.399129  | -0.152059 | 1                                                                                       | 2.317264  | -1.265733 | -1.640382 |
| 1                                                                 | 4.599309  | -2.568579 | 0.255001  | 1                                                                                       | 5.008206  | -1.298413 | 1.838186  |
| 1                                                                 | 6.763540  | -1.374280 | 0.365193  | 1                                                                                       | 5.127745  | 0.522830  | 1.905606  |
| 1                                                                 | 6.842269  | 1.104526  | 0.162349  | 1                                                                                       | 4.800388  | -1.209812 | -0.650964 |
| 6                                                                 | -5.136007 | -1.036994 | -1.404142 | 6                                                                                       | 5.176211  | 0.945763  | -0.868245 |
| 1                                                                 | -6.195120 | -0.988287 | -1.684868 | 1                                                                                       | 6.261676  | 0.868378  | -1.001564 |
| 1                                                                 | -4.554075 | -1.152424 | -2.327124 | 1                                                                                       | 4.977410  | 1.873756  | -0.320965 |
| 1                                                                 | -4.995687 | -1.945091 | -0.807154 | 1                                                                                       | 4.725706  | 1.039842  | -1.862823 |
| <b>3e2</b> HF = -999.5802808 ( <b>-999.8319376</b> )<br>Nimag = 0 |           |           |           | <b>3e2<sup>†</sup></b> HF = -999.5375967 ( <b>-999.7925511</b> )<br>Nimag = 1 (-469.37) |           |           |           |
| 6                                                                 | -0.115841 | 1.602022  | -0.537075 | 6                                                                                       | -3.405996 | 0.147248  | 0.290863  |
| 6                                                                 | -1.450720 | 0.936652  | -0.824325 | 6                                                                                       | -2.447913 | 1.222814  | 0.683261  |
| 6                                                                 | -1.506682 | -0.619261 | -0.896821 | 6                                                                                       | -1.530978 | 0.627536  | 1.580953  |
| 6                                                                 | -0.223078 | -1.404004 | -0.690780 | 6                                                                                       | -1.582335 | -0.753926 | 1.417118  |
| 6                                                                 | -2.529851 | 1.271491  | 0.286320  | 6                                                                                       | -2.533430 | -1.056951 | 0.414737  |
| 6                                                                 | -3.565156 | 0.187838  | -0.035287 | 6                                                                                       | -1.476897 | -0.433710 | -1.374112 |
| 6                                                                 | -2.601344 | -0.983978 | 0.189877  | 6                                                                                       | .261452   | -1.269685 | -1.273877 |
| 6                                                                 | -2.023773 | -0.600693 | 1.545182  | 6                                                                                       | 0.972312  | -0.605489 | -0.749004 |
| 6                                                                 | -1.982462 | 0.738698  | 1.603170  | 6                                                                                       | 2.083682  | -1.373650 | -0.463940 |
| 6                                                                 | -5.014833 | 0.244762  | 0.346432  | 6                                                                                       | 3.280424  | -0.786762 | 0.014300  |
| 6                                                                 | -4.600759 | 0.275416  | -1.119506 | 6                                                                                       | 4.432502  | -1.559590 | 0.323898  |
| 8                                                                 | -0.250676 | -2.627205 | -0.740826 | 6                                                                                       | 5.581126  | -0.955532 | 0.782543  |
| 8                                                                 | -0.055587 | 2.822419  | -0.457746 | 6                                                                                       | 5.633314  | 0.451202  | 0.952460  |
| 1                                                                 | -2.850807 | 2.314022  | 0.269579  | 6                                                                                       | 4.535898  | 1.229149  | 0.660851  |
| 1                                                                 | -1.547974 | 1.352772  | 2.385024  | 6                                                                                       | 3.333253  | 0.638252  | 0.186622  |
| 1                                                                 | -1.630949 | -1.305641 | 2.270470  | 6                                                                                       | 2.186685  | 1.407705  | -0.127375 |
| 1                                                                 | -2.975247 | -2.002356 | 0.083614  | 6                                                                                       | 1.024870  | 0.812553  | -0.577213 |

|   |           |           |           |   |           |           |           |
|---|-----------|-----------|-----------|---|-----------|-----------|-----------|
| 1 | -1.895756 | -0.933089 | -1.872510 | 6 | -0.152432 | 1.670855  | -0.918181 |
| 1 | -1.802687 | 1.367226  | -1.769279 | 6 | -1.425046 | 0.973524  | -1.202974 |
| 1 | -5.344442 | 1.202648  | 0.749484  | 6 | -4.854254 | 0.181184  | 0.816785  |
| 1 | -4.708952 | 1.206725  | -1.672298 | 6 | -4.564786 | 0.314623  | -0.653393 |
| 6 | 2.307298  | 1.386424  | -0.113311 | 1 | -2.700271 | 2.278617  | 0.681917  |
| 6 | 1.100399  | 0.756531  | -0.357098 | 1 | -0.812207 | 1.167383  | 2.186711  |
| 6 | 1.049510  | -0.670726 | -0.430597 | 1 | -0.907499 | -1.470544 | 1.871330  |
| 6 | 2.207681  | -1.406674 | -0.257539 | 1 | -2.845053 | -2.063923 | 0.159885  |
| 1 | 2.319329  | 2.471352  | -0.061682 | 1 | -2.240561 | -0.857327 | -2.019754 |
| 1 | 2.142435  | -2.489287 | -0.317498 | 8 | -0.263770 | -2.455244 | -1.597103 |
| 1 | -4.797817 | -0.616285 | -1.712833 | 1 | 2.024733  | -2.447042 | -0.621747 |
| 6 | 4.751479  | 1.284235  | 0.313497  | 1 | 4.389848  | -2.637674 | 0.190663  |
| 6 | 3.502813  | 0.651970  | 0.064683  | 1 | 6.456052  | -1.556013 | 1.016066  |
| 6 | 3.451678  | -0.781348 | -0.009501 | 1 | 6.547683  | 0.913438  | 1.314214  |
| 6 | 4.651252  | -1.523167 | 0.168332  | 1 | 4.573117  | 2.308169  | 0.788012  |
| 6 | 5.843758  | -0.879562 | 0.407864  | 1 | 2.207233  | 2.489143  | -0.024427 |
| 6 | 5.894282  | 0.536101  | 0.481098  | 8 | -0.065159 | 2.895999  | -0.951195 |
| 1 | 4.786647  | 2.369232  | 0.368672  | 1 | -2.149570 | 1.593058  | -1.723359 |
| 1 | 4.608905  | -2.607823 | 0.111482  | 1 | -5.112911 | 1.107069  | 1.328006  |
| 1 | 6.755401  | -1.455054 | 0.542403  | 6 | -5.524238 | -1.048618 | 1.389409  |
| 1 | 6.844049  | 1.028386  | 0.670817  | 1 | -4.700277 | 1.284076  | -1.127912 |
| 6 | -5.749270 | -0.949519 | 0.920692  | 1 | -4.811478 | -0.531590 | -1.292042 |
| 1 | -5.592068 | -1.028856 | 2.003077  | 1 | -5.222400 | -1.218282 | 2.429316  |
| 1 | -6.828421 | -0.868150 | 0.742441  | 1 | -6.614826 | -0.932489 | 1.370284  |
| 1 | -5.409822 | -1.886777 | 0.465791  | 1 | -5.276027 | -1.948503 | 0.816842  |

**Table S9.** Cartesian Coordinates of the B3LYP/6-31G\* Optimized Geometry of Spiro cyclopentadiene and various quinones. The Values in Parenthesis Implies Single-Point Energies Evaluated at the **B3LYP/6-311+G\*\*//B3LYP/6-31G\*** Level

| <b>1a</b> HF = -381.4516858 ( <b>-381.5616335</b> )<br>Nimag = 0 |           |           |          | <b>1b</b> HF = -460.0930138 ( <b>-460.2219625</b> )<br>Nimag = 0 |           |           |           |
|------------------------------------------------------------------|-----------|-----------|----------|------------------------------------------------------------------|-----------|-----------|-----------|
|                                                                  |           |           |          | 6                                                                | -1.436266 | -0.603235 | -0.000016 |
| 6                                                                | 1.268886  | 0.671718  | 0.000000 | 6                                                                | -0.678575 | 0.687022  | 0.000047  |
| 6                                                                | 1.268886  | -0.671770 | 0.000000 | 6                                                                | 0.678565  | 0.687018  | 0.000042  |
| 6                                                                | -0.000007 | -1.445182 | 0.000000 | 6                                                                | 1.436274  | -0.603236 | 0.000019  |
| 6                                                                | -1.268886 | -0.671718 | 0.000000 | 6                                                                | 0.669820  | -1.873843 | 0.000092  |
| 6                                                                | -1.268886 | 0.671770  | 0.000000 | 6                                                                | -0.669827 | -1.873839 | 0.000077  |
| 6                                                                | 0.000007  | 1.445182  | 0.000000 | 6                                                                | -1.493541 | 1.951513  | 0.000048  |
| 8                                                                | -0.000007 | -2.670347 | 0.000000 | 6                                                                | 1.493538  | 1.951502  | -0.000006 |
| 8                                                                | 0.000007  | 2.670347  | 0.000000 | 8                                                                | 2.662925  | -0.628870 | -0.000132 |
| 1                                                                | -2.183095 | -1.258539 | 0.000000 | 8                                                                | -2.662917 | -0.628883 | -0.000141 |
| 1                                                                | -2.183186 | 1.258447  | 0.000000 | 1                                                                | 1.263888  | -2.783342 | 0.000123  |
| 1                                                                | 2.183095  | 1.258539  | 0.000000 | 1                                                                | -1.263885 | -2.783345 | 0.000113  |
| 1                                                                | 2.183186  | -1.258447 | 0.000000 | 1                                                                | 1.268983  | 2.566110  | -0.880841 |
|                                                                  |           |           |          | 1                                                                | 1.269815  | 2.565602  | 0.881404  |
|                                                                  |           |           |          | 1                                                                | 2.558417  | 1.713919  | -0.000537 |

|                                                         |           |           |           |           |                                                         |           |           |           |
|---------------------------------------------------------|-----------|-----------|-----------|-----------|---------------------------------------------------------|-----------|-----------|-----------|
|                                                         | 1         | -1.269396 | 2.565865  | 0.881167  |                                                         |           |           |           |
|                                                         | 1         | -1.269400 | 2.565866  | -0.881078 |                                                         |           |           |           |
|                                                         | 1         | -2.558422 | 1.713937  | 0.000016  |                                                         |           |           |           |
| <b>1c</b> HF = -610.3459704 (-610.5171171)<br>Nimag = 0 |           |           |           |           | <b>1d</b> HF = -535.1159458 (-535.2582862)<br>Nimag = 0 |           |           |           |
| 6                                                       | -2.276694 | -1.253855 | 0.000023  |           | 6                                                       | 2.677864  | 0.699637  | -0.000020 |
| 6                                                       | -1.399719 | -2.327352 | 0.000032  |           | 6                                                       | 2.677886  | -0.699520 | 0.000024  |
| 6                                                       | -1.781745 | 0.065140  | -0.000002 |           | 6                                                       | 1.472727  | 1.400226  | -0.000022 |
| 6                                                       | -0.010813 | -2.126263 | 0.000013  |           | 6                                                       | 1.472773  | -1.400206 | 0.000052  |
| 6                                                       | 0.493161  | -0.832124 | -0.000003 |           | 6                                                       | 0.260161  | -0.704410 | 0.000019  |
| 6                                                       | -0.382184 | 0.282991  | -0.000014 |           | 6                                                       | 0.260127  | 0.704375  | 0.000061  |
| 6                                                       | 0.148017  | 1.648450  | -0.000018 |           | 6                                                       | -1.025135 | 1.463078  | 0.000235  |
| 6                                                       | 1.616249  | 1.828455  | 0.000062  |           | 6                                                       | -2.281301 | 0.671539  | 0.000041  |
| 6                                                       | 2.458270  | 0.781678  | 0.000058  |           | 6                                                       | -2.281252 | -0.671941 | 0.000090  |
| 6                                                       | 1.970888  | -0.621386 | -0.000017 |           | 6                                                       | -1.024972 | -1.463031 | -0.000041 |
| 1                                                       | 0.683434  | -2.959329 | 0.000007  |           | 1                                                       | 1.447353  | 2.485298  | -0.000020 |
| 1                                                       | 1.961352  | 2.858609  | 0.000109  |           | 1                                                       | 1.447337  | -2.485251 | 0.000062  |
| 1                                                       | 3.537877  | 0.902799  | 0.000096  |           | 1                                                       | -3.199444 | 1.253151  | -0.000055 |
| 8                                                       | -0.590644 | 2.649859  | -0.000047 |           | 1                                                       | -3.199235 | -1.253700 | 0.000216  |
| 8                                                       | 2.767825  | -1.552669 | -0.000074 |           | 8                                                       | -1.061831 | 2.688227  | -0.000199 |
| 1                                                       | -1.795515 | -3.339186 | 0.000051  |           | 8                                                       | -1.061585 | -2.688000 | -0.000154 |
| 1                                                       | -3.352544 | -1.396075 | 0.000038  |           | 1                                                       | 3.619055  | -1.242227 | 0.000022  |
| 8                                                       | -2.665302 | 1.070769  | -0.000021 |           | 1                                                       | 3.618986  | 1.242431  | -0.000031 |
| 1                                                       | -2.142209 | 1.915109  | 0.000032  |           |                                                         |           |           |           |
| <b>1e</b> HF = -688.7611014 (-688.9369829)<br>Nimag = 0 |           |           |           |           | <b>2de</b> HF = -271.490377 (-271.5634367)<br>Nimag = 0 |           |           |           |
| 6                                                       | 4.001677  | 0.708329  | -0.000018 |           | 6                                                       | 0.433177  | 0.000212  | -0.000148 |
| 6                                                       | 2.813787  | 1.405636  | -0.000027 |           | 6                                                       | -0.468235 | 1.175973  | -0.000244 |
| 6                                                       | 1.571608  | 0.717741  | -0.000005 |           | 6                                                       | -1.747208 | 0.732888  | -0.000067 |
| 6                                                       | 1.571605  | -0.717773 | 0.000026  |           | 6                                                       | -1.746952 | -0.733243 | 0.000151  |
| 6                                                       | 2.813804  | -1.405623 | 0.000028  |           | 6                                                       | -0.467757 | -1.175778 | 0.000016  |
| 6                                                       | 4.001684  | -0.708290 | 0.000012  |           | 6                                                       | 1.777719  | 0.000343  | 0.743034  |
| 6                                                       | 0.330520  | 1.403012  | -0.000007 |           | 6                                                       | 1.778034  | -0.000261 | -0.742845 |
| 6                                                       | 0.330499  | -1.403069 | 0.000034  |           | 1                                                       | -0.124797 | 2.204609  | -0.000352 |
| 6                                                       | -0.864916 | -0.714794 | 0.000012  |           | 1                                                       | -2.640299 | 1.348736  | 0.000071  |
| 6                                                       | -0.864918 | 0.714747  | 0.000070  |           | 1                                                       | -2.639771 | -1.349458 | 0.000226  |
| 6                                                       | -2.149474 | 1.470448  | 0.000267  |           | 1                                                       | -0.124170 | -2.204381 | 0.000070  |
| 6                                                       | -3.400921 | 0.672008  | 0.000045  |           | 1                                                       | 2.044173  | 0.913591  | 1.266898  |
| 6                                                       | -3.400901 | -0.672304 | 0.000097  |           | 1                                                       | 2.043827  | -0.912673 | 1.267505  |
| 6                                                       | -2.149375 | -1.470352 | -0.000060 |           | 1                                                       | 2.043961  | -0.913831 | -1.266406 |
| 1                                                       | 0.305904  | 2.489277  | 0.000003  |           | 1                                                       | 2.044406  | 0.912614  | -1.267398 |
| 1                                                       | 4.946938  | 1.243951  | -0.000034 |           |                                                         |           |           |           |
| 1                                                       | 2.810223  | 2.492664  | -0.000036 |           |                                                         |           |           |           |
| 1                                                       | 2.810269  | -2.492652 | 0.000043  |           |                                                         |           |           |           |
| 1                                                       | 4.946949  | -1.243901 | 0.000011  |           |                                                         |           |           |           |
| 1                                                       | 0.305761  | -2.489305 | 0.000038  |           |                                                         |           |           |           |

|                                                          |           |           |           |
|----------------------------------------------------------|-----------|-----------|-----------|
| 1                                                        | -4.321315 | 1.250281  | -0.000066 |
| 1                                                        | -4.321160 | -1.250686 | 0.000241  |
| 8                                                        | -2.194532 | 2.696208  | -0.000217 |
| 8                                                        | -2.194424 | -2.695948 | -0.000164 |
| <b>3de</b> HF = -310.8065322 (-310.8897259)<br>Nimag = 0 |           |           |           |
| 6                                                        | 0.018651  | -0.256533 | 0.162865  |
| 6                                                        | -0.598744 | 1.056609  | 0.465080  |
| 6                                                        | -1.909070 | 0.999777  | 0.126831  |
| 6                                                        | -2.212128 | -0.330677 | -0.405235 |
| 6                                                        | -1.084707 | -1.079844 | -0.384434 |
| 6                                                        | 1.130610  | -0.867671 | 1.034528  |
| 6                                                        | 1.467793  | -0.426083 | -0.343907 |
| 1                                                        | -0.072224 | 1.900659  | 0.894476  |
| 1                                                        | -2.632549 | 1.801478  | 0.231362  |
| 1                                                        | -3.188549 | -0.647926 | -0.755594 |
| 1                                                        | -0.968741 | -2.107236 | -0.712159 |
| 1                                                        | 1.472915  | -0.259660 | 1.868158  |
| 1                                                        | 1.054438  | -1.928562 | 1.255003  |
| 1                                                        | 1.568875  | -1.220497 | -1.081478 |
| 6                                                        | 2.353613  | 0.773538  | -0.603403 |
| 1                                                        | 3.407403  | 0.469323  | -0.632463 |
| 1                                                        | 2.111883  | 1.246918  | -1.561702 |
| 1                                                        | 2.250434  | 1.530809  | 0.180454  |
